# Supplementary material for: Implications of Organic Dairy Management on Herd Performance and Milk Fatty Acid Profiles and Interactions with Season
Source: MDPI journal article supplement (doi:10.3390/foods12081589), 2023-04-08
Supplement: s1 [file s1]

## Supplementary Data

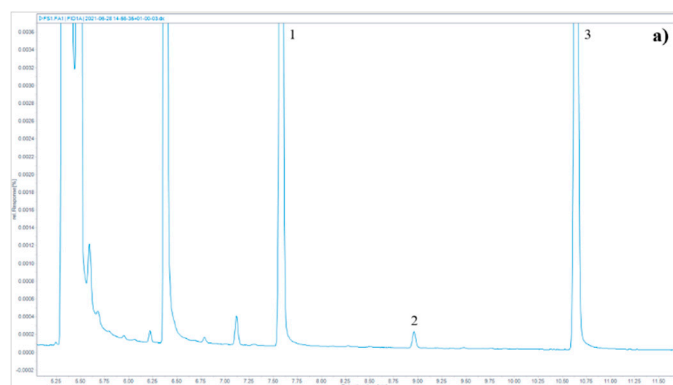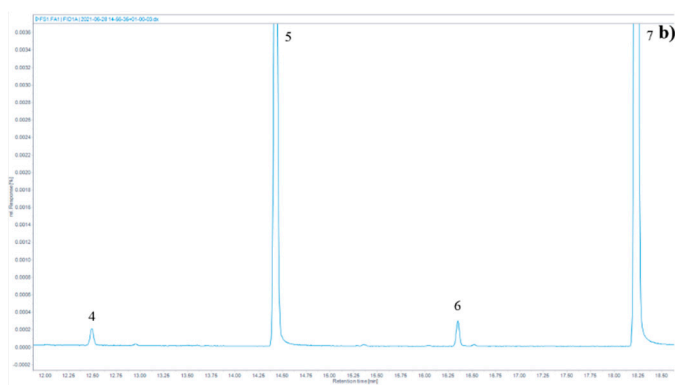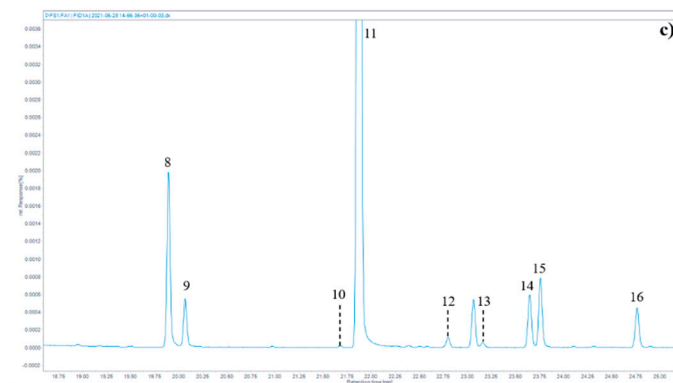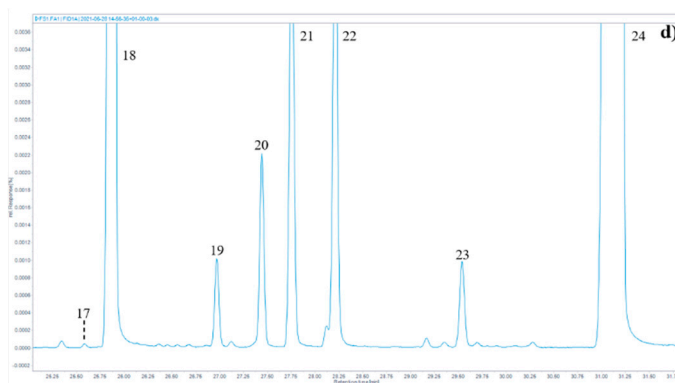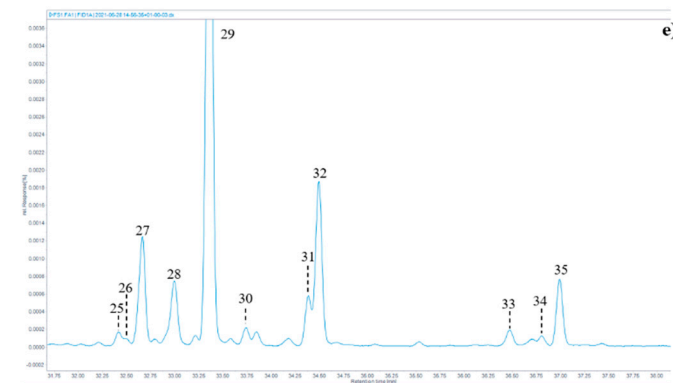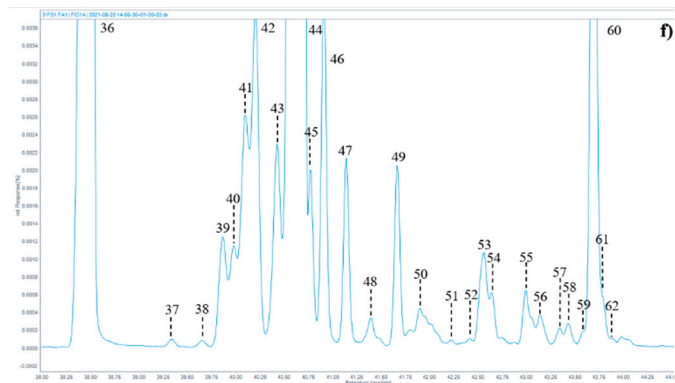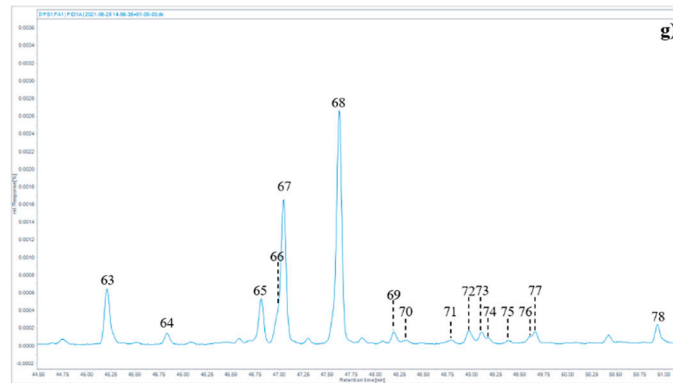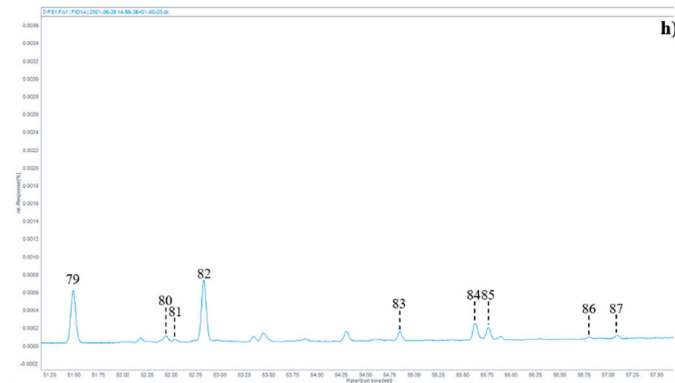

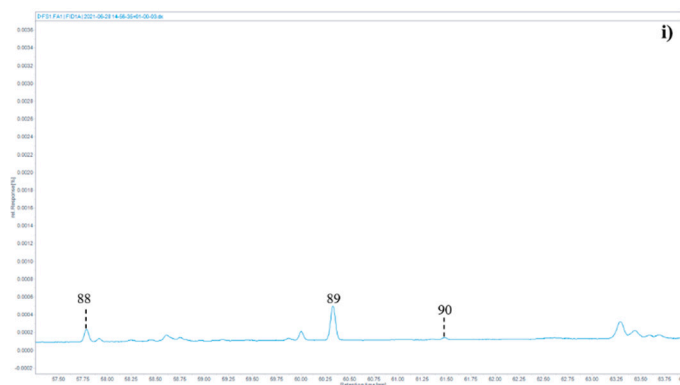

**Figure S1:** Gas chromatogram illustrating the separation of fatty acid methyl esters in milk from the bulk tanks of 67 farms across Southern England over 12 months. The left y-axis represents arbitrary response and the x-axis represents the retention time from 5 to 70 min. Chromatographic conditions are presented in the Materials and Methods. The following peaks were identified: 1=C4:0, 2=C5:0, 3=C6:0, 4=C7:0, 5=C8:0, 6=C9:0, 7=C10:0, 8=C10:1 *c*9, 9=C11:0, 10=C11:1 *c*10, 11=C12:0, 12=C13:0 iso, 13=C13:0 anteiso, 14=C12:1 *c*9, 15=C13:0, 16=C14:0 iso, 17=C13:1, 18=C14:0, 19=C14:1 *t*9, 20=C15:0, 21=C15:1 *c*9, 22=C15:0 anteiso, 23=C16:0 iso, 24=C16:0, 25=C16:1 *t*6-8, 26=C16:1 *t*9, 27=C17:0 iso, 28=C16:1 *t*11/13, 29=C16:1 + C17:0 anteiso, 30=C16:1 *c*11, 31=C16:1 *c*13, 32=C17:0, 33=C17:1 *t*10, 34=C18:0 iso, 35=C17: *c*9, 36=C18:0, 37=C18:1 *t*4, 38=C18:1 *t*5, 39=C18:1 *t*6-8, 40=C18:1 *t*9, 41=C18:1 *t*10, 42=C18:1 *t*11, 43=C18:1 *c*6/*t*12, 44=C18:1 *c*9, 45=C18:1 *t*15, 46=C18:1 *c*11, 47=C18:1 *c*12, 48=C18:1 *c*13, 49=C18:1 *t*6 + C18:1 *c*14, 50=C19:0 + C18:1 *c*15, 51=C18:2 *t*11/*t*15, 52=C18:2 *t*9/*t*12, 53=C18:2 *c*8/*c*13, 54=C18:2 *c*10/*t*14, 55=C18:2 *c*9/*c*14, 56=C18:2 *c*9/*t*12, 57=C18:1 *c*16, 58=C18:1 *t*11/*c*15, 59=C18:2 *t*9/*c*12, 60=C18:2 *c*9/*c*12, 61=C18:2 *t*12 *c*15, 62=C19:1, 63=C20:0, 64=C18:3 *c*6 *c*9 *c*12, 65=C20:1 *c*8, 66=C20:1 *c*11, 67=C18:3 *c*9 *c*12 *c*15, 68=CLA *c*9 *t*11+*t*7/*c*9 +*t*8/*c*10+*t*6/*c*8, 69-76=other CLA of unknown isomerism, 77=C20:2 *c*11/*c*14, 78=C22:0, 79=C20:3 *c*8/*c*11/*c*14, 80=C22:1 *c*13, 81=C20:3 *c*11/*c*14/*c*17, 82=C20:4 *c*5/*c*8/*c*11/*c*14, 83=C22:2 *c*13/*c*16, 84=C20:5 *c*5/*c*8/*c*11/*c*14/*c*17 (EPA), 85=C24:0, 86=C24:1 *c*15, 87=C22:3 *c*13/*c*16/*c*19, 88=C22:4 *c*7/*c*10/*c*13/*c*16, 89=C22:5 *c*7/*c*10/*c*13/*c*16/*c*19 (DPA), 90=C22:6 *c*4/*c*7/*c*10/*c*13/*c*16/*c*19 (DHA).

**Table S1.** Mean, minimum and maximum values for the breed and diet composition of herds (%) from 67 farms in Southern England.

|                                         | Mean<br>n=67 | Min<br>n=67 | Max<br>n=67 | SE    |
|-----------------------------------------|--------------|-------------|-------------|-------|
| Milking herd size (number of cows)      | 247          | 75          | 670         | 4.0   |
| Milking cows (% herd)                   | 86           | 30          | 100         | 0.4   |
| Estimated Liveweight (kg) <sup>1</sup>  | 649          | 468         | 680         | 1.7   |
| Holstein                                | 74.8         | 0           | 100         | 1.36  |
| British Friesian                        | 3.28         | 0           | 100         | 0.493 |
| NZ Friesian                             | 0.56         | 0           | 100         | 0.257 |
| Jersey                                  | 0.53         | 0           | 16.3        | 0.079 |
| Scandinavian Red                        | 0.42         | 0           | 41.0        | 0.070 |
| Shorthorn                               | 0.30         | 0           | 6.67        | 0.036 |
| Ayrshire                                | 4.76         | 0           | 100         | 0.723 |
| Montbeliarde                            | 0.06         | 0           | 6.45        | 0.017 |
| Brown Swiss                             | 0.95         | 0           | 51.4        | 0.192 |
| Guernsey                                | 0.03         | 0           | 1.57        | 0.007 |
| Other breed or crossbreed               | 14.3         | 0           | 100         | 1.19  |
| Offered feed (kg DM / day) <sup>2</sup> | 20.2         | 6.80        | 31.7        | 0.09  |
| Total Forage                            | 66.2         | 39.4        | 95.6        | 0.40  |
| Total concentrate                       | 33.9         | 4.37        | 60.6        | 0.40  |
| Predicted grazing intake                | 14.8         | 0           | 91.4        | 0.84  |
| Total Silage intake                     | 49.3         | 0           | 114         | 0.69  |
| Grass silage                            | 26.9         | 0           | 81.9        | 0.62  |
| Grass:clover silage <sup>4</sup>        | 1.77         | 0           | 67.3        | 0.246 |
| Maize silage                            | 15.6         | 0           | 54.2        | 0.54  |
| Cereal silage                           | 0.15         | 0           | 35.9        | 0.066 |
| Lucerne silage                          | 12.5         | 0.25        | 0           | 0.05  |
| Other mixed silage                      | 53.7         | 1.12        | 0           | 0.17  |
| Wholecrop                               | 49.8         | 3.49        | 0           | 0.28  |
| Hay and Straw                           | 30.4         | 2.26        | 0           | 0.12  |
| Moist by-products                       | 25.6         | 3.03        | 0           | 0.19  |
| Dry straights <sup>3</sup>              | 44.4         | 6.77        | 0           | 0.40  |
| Cereals                                 | 21.0         | 3.06        | 0           | 0.18  |
| Blends                                  | 59.1         | 20.5        | 0           | 0.45  |
| Oil                                     | 4.03         | 0.51        | 0           | 0.029 |
| Minerals (g/cow per day)                | 750          | 110         | 0           | 3.9   |
| Vitamins (g/cow per day)                | 320          | 6.59        | 0           | 1.4   |

<sup>1</sup>Average herd live weights were estimated based on average breed live weights and the proportionate number of cows from each breed or crossbreed in the total herd, as described by Stergiadis, et al. [1].

<sup>2</sup>When cows had no access to pasture, this value reflects the summary of individual feeds DM as recorded in farmers' questionnaires. During the grazing season, this is predicted using equations published by [2].

---

<sup>3</sup>Dry straights: single feeding stuffs which from which compound feeds and protein concentrates are prepared (wheat, barley, flaked maize, field beans, groundnut cake and meal, soya bean meal).

---

**Table S2.** Means  $\pm$  SE and P-values for the breed and diet composition of herds (%) from 67 Farms with two differing production systems (Conventional and organic) in Southern England between January and December (2019)

|                                                         | Month                        |                               |                            |                            |                          |                           |                           |                             |                                |                              |                               |                               | SE    | P-Value <sup>2</sup> |
|---------------------------------------------------------|------------------------------|-------------------------------|----------------------------|----------------------------|--------------------------|---------------------------|---------------------------|-----------------------------|--------------------------------|------------------------------|-------------------------------|-------------------------------|-------|----------------------|
|                                                         | January<br>n=65 <sup>1</sup> | February<br>n=65 <sup>1</sup> | March<br>n=66 <sup>1</sup> | April<br>n=67 <sup>1</sup> | May<br>n=67 <sup>1</sup> | June<br>n=67 <sup>1</sup> | July<br>n=67 <sup>1</sup> | August<br>n=67 <sup>1</sup> | September<br>n=67 <sup>1</sup> | October<br>n=66 <sup>1</sup> | November<br>n=65 <sup>1</sup> | December<br>n=65 <sup>1</sup> |       |                      |
| Milking herd size (no.cows)                             | 244 <sup>bcd</sup>           | 240 <sup>bcd</sup>            | 251 <sup>a</sup>           | 254 <sup>a</sup>           | 253 <sup>a</sup>         | 250 <sup>ab</sup>         | 240 <sup>cd</sup>         | 236 <sup>d</sup>            | 245 <sup>abc</sup>             | 249 <sup>ab</sup>            | 249 <sup>ab</sup>             | 248 <sup>abc</sup>            | 14.0  | <0.001               |
| Milking cows (% herd)                                   | 85.5 <sup>defg</sup>         | 84.7 <sup>efgh</sup>          | 86.8 <sup>abcdnf</sup>     | 87.6 <sup>abc</sup>        | 87.9 <sup>ac</sup>       | 86.3 <sup>bcdef</sup>     | 83.4 <sup>gh</sup>        | 82.6 <sup>h</sup>           | 85 <sup>fg</sup>               | 85.9 <sup>cdef</sup>         | 86.7 <sup>abcde</sup>         | 87.0 <sup>abcde</sup>         | 1.21  | 0.002                |
| Estimated Liveweight (kg) <sup>3</sup>                  | 653                          | 650                           | 650                        | 650                        | 650                      | 650                       | 650                       | 650                         | 647                            | 645                          | 646                           | 647                           | 6.0   | 0.567                |
| Breed composition (% of herd)                           |                              |                               |                            |                            |                          |                           |                           |                             |                                |                              |                               |                               |       |                      |
| Holstein                                                | 78.2                         | 75.7                          | 75.1                       | 75.1                       | 75.3                     | 75.3                      | 75.4                      | 75.2                        | 73.9                           | 72.5                         | 72.6                          | 73.6                          | 4.75  | 0.523                |
| British Friesian                                        | 2.53                         | 2.51                          | 3.11                       | 3.11                       | 2.93                     | 3.08                      | 3.05                      | 3.05                        | 2.91                           | 4.28                         | 4.30                          | 4.49                          | 1.707 | 0.333                |
| NZ Friesian                                             | 0.75                         | 0.00                          | 0.00                       | 0.00                       | 0.00                     | 0.00                      | 0.00                      | 0.00                        | 1.49                           | 1.49                         | 1.49                          | 1.54                          | 0.564 | 0.462                |
| Jersey                                                  | 0.51                         | 0.49                          | 0.44                       | 0.48                       | 0.61                     | 0.50                      | 0.46                      | 0.58                        | 0.59                           | 0.56                         | 0.56                          | 0.59                          | 0.272 | 0.478                |
| Scandinavian Red                                        | 0.89                         | 0.20                          | 0.44                       | 0.41                       | 0.40                     | 0.38                      | 0.41                      | 0.45                        | 0.38                           | 0.38                         | 0.37                          | 0.40                          | 0.211 | 0.353                |
| Shorthorn                                               | 0.26                         | 0.24                          | 0.38                       | 0.42                       | 0.36                     | 0.29                      | 0.29                      | 0.27                        | 0.25                           | 0.24                         | 0.26                          | 0.28                          | 0.125 | 0.213                |
| Ayrshire                                                | 4.91                         | 4.75                          | 4.66                       | 4.67                       | 4.76                     | 4.76                      | 4.76                      | 4.76                        | 4.76                           | 4.76                         | 4.74                          | 4.89                          | 2.523 | 0.997                |
| Montbeliarde                                            | 0.13                         | 0.10                          | 0.13                       | 0.13                       | 0.03                     | 0.03                      | 0.01                      | 0.01                        | 0.02                           | 0.02                         | 0.02                          | 0.05                          | 0.045 | 0.405                |
| Brown Swiss                                             | 0.39                         | 0.38                          | 1.01                       | 1.01                       | 1.01                     | 1.04                      | 1.07                      | 1.13                        | 1.08                           | 1.12                         | 1.11                          | 1.06                          | 0.639 | 0.505                |
| Guernsey                                                | 0.03                         | 0.03                          | 0.03                       | 0.03                       | 0.03                     | 0.03                      | 0.03                      | 0.03                        | 0.03                           | 0.03                         | 0.03                          | 0.04                          | 0.025 | 0.924                |
| Other breed or crossbreed                               | 11.4                         | 15.6                          | 14.7                       | 14.7                       | 14.6                     | 14.6                      | 14.5                      | 14.6                        | 14.6                           | 14.6                         | 14.5                          | 13.0                          | 4.14  | 0.178                |
| Diet Composition (% DM offered unless otherwise stated) |                              |                               |                            |                            |                          |                           |                           |                             |                                |                              |                               |                               |       |                      |
| Offered feed (kg DM / day) <sup>4</sup>                 | 20.7 <sup>abc</sup>          | 20.7 <sup>ab</sup>            | 20.9 <sup>a</sup>          | 20.4 <sup>bcd</sup>        | 20.2 <sup>bcd</sup>      | 19.9 <sup>cde</sup>       | 19.8 <sup>de</sup>        | 19.8 <sup>cde</sup>         | 19.8 <sup>de</sup>             | 20.1 <sup>bcd</sup>          | 19.4 <sup>e</sup>             | 20.5 <sup>bcd</sup>           | 0.288 | <0.001               |
| Total Forage                                            | 64.7                         | 64.5                          | 64.6                       | 66.4                       | 66.7                     | 66.9                      | 67.9                      | 68.2                        | 66.1                           | 66.1                         | 65.8                          | 65.8                          | 1.39  | 0.108                |
| Total concentrate                                       | 35.4                         | 35.6                          | 35.4                       | 33.6                       | 33.3                     | 33.1                      | 32.1                      | 31.8                        | 33.9                           | 33.9                         | 34.2                          | 34.2                          | 1.39  | 0.108                |
| Predicted grazing intake                                | 0.00 <sup>f</sup>            | 0.00 <sup>f</sup>             | 6.40 <sup>e</sup>          | 25.2 <sup>cb</sup>         | 30.9 <sup>a</sup>        | 31.3 <sup>a</sup>         | 29.6 <sup>ba</sup>        | 24.8 <sup>c</sup>           | 19.3 <sup>d</sup>              | 9.09 <sup>e</sup>            | 0.00 <sup>f</sup>             | 0.00 <sup>f</sup>             | 1.928 | <0.001               |
| Total Silage intake                                     | 61.3 <sup>a</sup>            | 61.1 <sup>a</sup>             | 56.0 <sup>b</sup>          | 39.2 <sup>ed</sup>         | 33.8 <sup>g</sup>        | 33.7 <sup>g</sup>         | 35.7 <sup>eg</sup>        | 38.9 <sup>d</sup>           | 41.5 <sup>c</sup>              | 55.5 <sup>b</sup>            | 64.7 <sup>a</sup>             | 64.1 <sup>a</sup>             | 1.94  | <0.001               |
| Grass silage                                            | 33.5 <sup>ab</sup>           | 33.2 <sup>ab</sup>            | 29.6 <sup>cd</sup>         | 20.0 <sup>e</sup>          | 16.0 <sup>f</sup>        | 16.6 <sup>f</sup>         | 20.2 <sup>e</sup>         | 25.0 <sup>d</sup>           | 25.2 <sup>d</sup>              | 30.9 <sup>bc</sup>           | 36.9 <sup>a</sup>             | 36.6 <sup>a</sup>             | 1.94  | <0.001               |
| Grass:clover silage <sup>5</sup>                        | 3.63 <sup>ab</sup>           | 3.88 <sup>a</sup>             | 4.04 <sup>a</sup>          | 0.55 <sup>c</sup>          | 0.68 <sup>c</sup>        | 0.76 <sup>c</sup>         | 0.82 <sup>c</sup>         | 0.76 <sup>c</sup>           | 1.04 <sup>c</sup>              | 1.20 <sup>c</sup>            | 2.10 <sup>bc</sup>            | 1.80 <sup>bc</sup>            | 0.741 | <0.001               |
| Maize silage                                            | 17.6 <sup>ab</sup>           | 17.9 <sup>ab</sup>            | 16.6 <sup>ba</sup>         | 15.2 <sup>fdba</sup>       | 14.9 <sup>gfed</sup>     | 13.9 <sup>efgh</sup>      | 13.8 <sup>gh</sup>        | 12.5 <sup>h</sup>           | 14.0 <sup>fgh</sup>            | 15.5 <sup>gedcb</sup>        | 17.5 <sup>acd</sup>           | 17.4 <sup>acd</sup>           | 1.87  | <0.001               |

|                            | 1                    | 2                    | 3                   | 4                    | 5                    | 6                   | 7                    | 8                    | 9                    | 10                   | 11                  | 12                  | 13    | 14     |
|----------------------------|----------------------|----------------------|---------------------|----------------------|----------------------|---------------------|----------------------|----------------------|----------------------|----------------------|---------------------|---------------------|-------|--------|
| Cereal silage              | 0.00                 | 0.00                 | 0.00                | 0.00                 | 0.00                 | 0.00                | 0.00                 | 0.00                 | 0.00                 | 2.00                 | 1.76                | 0.56                | 0.271 | 0.086  |
| Lucerne silage             | 0.33 <sup>abcd</sup> | 0.27 <sup>abcd</sup> | 0.24 <sup>cd</sup>  | 0.25 <sup>abcd</sup> | 0.20 <sup>a</sup>    | 0.17 <sup>d</sup>   | 0.17 <sup>d</sup>    | 0.17 <sup>d</sup>    | 0.17 <sup>d</sup>    | 0.19 <sup>d</sup>    | 0.26 <sup>bcd</sup> | 0.60 <sup>ac</sup>  | 0.161 | 0.027  |
| Other mixed silage         | 0.89                 | 1.26                 | 1.14                | 1.12                 | 0.89                 | 1.14                | 0.77                 | 0.47                 | 1.10                 | 0.59                 | 1.48                | 2.66                | 0.542 | 0.200  |
| Wholecrop                  | 5.28 <sup>dcba</sup> | 4.53 <sup>cd</sup>   | 4.39 <sup>cd</sup>  | 2.10 <sup>fg</sup>   | 1.12 <sup>gh</sup>   | 1.14 <sup>gh</sup>  | 0.43 <sup>h</sup>    | 2.56 <sup>fg</sup>   | 3.40 <sup>df</sup>   | 6.28 <sup>a</sup>    | 5.85 <sup>ac</sup>  | 4.84 <sup>bcd</sup> | 0.895 | <0.001 |
| Hay and Straw              | 3.37 <sup>a</sup>    | 3.39 <sup>a</sup>    | 2.21 <sup>b</sup>   | 2.01 <sup>b</sup>    | 2.04 <sup>b</sup>    | 1.99 <sup>b</sup>   | 2.20 <sup>b</sup>    | 1.94 <sup>b</sup>    | 1.93 <sup>b</sup>    | 2.38 <sup>b</sup>    | 1.75 <sup>b</sup>   | 1.95 <sup>b</sup>   | 0.387 | 0.035  |
| Moist by-products          | 3.02                 | 3.13                 | 3.32                | 2.91                 | 2.92                 | 3.16                | 3.25                 | 2.98                 | 3.18                 | 2.8                  | 3.09                | 2.62                | 0.654 | 0.359  |
| Dry straights <sup>6</sup> | 8.31                 | 8.03                 | 7.37                | 6.77                 | 6.31                 | 6.60                | 6.04                 | 5.81                 | 6.52                 | 6.92                 | 6.50                | 6.13                | 1.384 | 0.608  |
| Cereals                    | 3.67 <sup>abcd</sup> | 3.36 <sup>abcd</sup> | 3.56 <sup>ac</sup>  | 2.68 <sup>bcd</sup>  | 2.83 <sup>abcd</sup> | 2.30 <sup>d</sup>   | 2.80 <sup>abcd</sup> | 3.17 <sup>abcd</sup> | 3.06 <sup>abcd</sup> | 3.11 <sup>abcd</sup> | 2.33 <sup>cd</sup>  | 3.90 <sup>ab</sup>  | 0.609 | 0.029  |
| Blends                     | 19.9                 | 20.5                 | 20.7                | 20.8                 | 20.7                 | 20.5                | 19.5                 | 19.3                 | 20.6                 | 20.6                 | 21.8                | 21.0                | 1.55  | 0.456  |
| Oil                        | 0.49                 | 0.50                 | 0.48                | 0.53                 | 0.48                 | 0.50                | 0.53                 | 0.53                 | 0.54                 | 0.50                 | 0.50                | 0.56                | 0.102 | 0.830  |
| Minerals (g/cow per day)   | 112                  | 116                  | 111                 | 113                  | 100                  | 95.4                | 98.6                 | 101                  | 106                  | 120                  | 118                 | 123                 | 13.3  | 0.236  |
| Vitamins (g/cow per day)   | 8.80 <sup>abc</sup>  | 8.60 <sup>abc</sup>  | 8.60 <sup>abc</sup> | 7.56 <sup>abc</sup>  | 7.39 <sup>abc</sup>  | 7.43 <sup>abc</sup> | 6.57 <sup>abc</sup>  | 6.57 <sup>abc</sup>  | 6.57 <sup>ba</sup>   | 0.00 <sup>c</sup>    | 0.00 <sup>cb</sup>  | 11.2 <sup>a</sup>   | 4.40  | 0.001  |

<sup>1</sup>n is the number of records used to calculate means  $\pm$  SE and P-values. Records with missing values were not included in the analysis.

<sup>2</sup>Significances were declared at P-value <0.05.

<sup>3</sup>Average herd live weights were estimated based on average breed live weights and the proportionate number of cows from each breed or crossbreed in the total herd, as described by Stergiadis, et al. [1].

<sup>4</sup>When cows had no access to pasture, this value reflects the summary of individual feeds DM as recorded in farmers' questionnaires. During the grazing season, this is predicted using equations published by Butler et al. (2008)

<sup>5</sup>In the conventional production system, this was predominantly perennial ryegrass silage, while in organic systems silage typically has variant grass:clover ratios.

<sup>6</sup>Dry straights: single feeding stuffs which from which compound feeds and protein concentrates are prepared (wheat, barley, flaked maize, field beans, groundnut cake and meal, soya bean meal).

**Table S3.** Means  $\pm$  SE and P-values for the Productivity, basic composition, efficiency, health parameters and indicators of herds from 67 farms with two differing production systems (Conventional and organic) in Southern England between January and December (2019)

|                                                                    | Month                        |                               |                            |                            |                          |                           |                           |                             |                                |                              |                               |                               | SE    | P-Value <sup>2</sup> |
|--------------------------------------------------------------------|------------------------------|-------------------------------|----------------------------|----------------------------|--------------------------|---------------------------|---------------------------|-----------------------------|--------------------------------|------------------------------|-------------------------------|-------------------------------|-------|----------------------|
|                                                                    | January<br>n=65 <sup>1</sup> | February<br>n=67 <sup>1</sup> | March<br>n=67 <sup>1</sup> | April<br>n=67 <sup>1</sup> | May<br>n=67 <sup>1</sup> | June<br>n=67 <sup>1</sup> | July<br>n=67 <sup>1</sup> | August<br>n=67 <sup>1</sup> | September<br>n=67 <sup>1</sup> | October<br>n=67 <sup>1</sup> | November<br>n=67 <sup>1</sup> | December<br>n=65 <sup>1</sup> |       |                      |
| Productivity (kg/cow per day)                                      |                              |                               |                            |                            |                          |                           |                           |                             |                                |                              |                               |                               |       |                      |
| Milk Yield                                                         | 27.0 <sup>bcd</sup>          | 26.6 <sup>d</sup>             | 26.9 <sup>d</sup>          | 27.7 <sup>ac</sup>         | 27.8 <sup>ac</sup>       | 26.9 <sup>bcd</sup>       | 26.7 <sup>d</sup>         | 26.2 <sup>d</sup>           | 26.0 <sup>d</sup>              | 25.9 <sup>d</sup>            | 26.1 <sup>d</sup>             | 26.9 <sup>cd</sup>            | 0.71  | 0.007                |
| ECMY                                                               | 28.0 <sup>abcdef</sup>       | 27.4 <sup>abcdef</sup>        | 27.5 <sup>bcdef</sup>      | 28.0 <sup>ac</sup>         | 27.9 <sup>ecba</sup>     | 27.0 <sup>cef</sup>       | 26.1 <sup>g</sup>         | 26.7 <sup>f</sup>           | 26.8 <sup>efg</sup>            | 27.2 <sup>cdef</sup>         | 27.6 <sup>abcde</sup>         | 28.1 <sup>abcd</sup>          | 0.69  | 0.003                |
| Milk fat yield                                                     | 1.08 <sup>ac</sup>           | 1.05 <sup>bcd</sup>           | 1.06 <sup>abcd</sup>       | 1.06 <sup>abc</sup>        | 1.05 <sup>cba</sup>      | 1.02 <sup>d</sup>         | 1.00 <sup>e</sup>         | 1.02 <sup>cd</sup>          | 1.03 <sup>cd</sup>             | 1.05 <sup>abcd</sup>         | 1.07 <sup>ab</sup>            | 1.09 <sup>ab</sup>            | 0.026 | <0.001               |
| Milk protein yield                                                 | 1.00 <sup>abcde</sup>        | 0.89 <sup>bcde</sup>          | 0.88 <sup>de</sup>         | 0.91 <sup>ac</sup>         | 0.91 <sup>ac</sup>       | 0.87 <sup>de</sup>        | 0.86 <sup>e</sup>         | 0.86 <sup>e</sup>           | 0.87 <sup>e</sup>              | 0.88 <sup>cde</sup>          | 0.90 <sup>abd</sup>           | 0.91 <sup>abcd</sup>          | 0.023 | <0.001               |
| Basic Composition (g/kg milk)                                      |                              |                               |                            |                            |                          |                           |                           |                             |                                |                              |                               |                               |       |                      |
| Milk fat                                                           | 40.3 <sup>bcde</sup>         | 39.2 <sup>f</sup>             | 39.5 <sup>def</sup>        | 38.5 <sup>g</sup>          | 37.7 <sup>h</sup>        | 38.2 <sup>gh</sup>        | 36.7 <sup>i</sup>         | 39.3 <sup>ef</sup>          | 39.9 <sup>cdf</sup>            | 40.9 <sup>ab</sup>           | 41.5 <sup>a</sup>             | 40.6 <sup>bc</sup>            | 0.32  | <0.001               |
| Milk protein                                                       | 33.3 <sup>cd</sup>           | 33.2 <sup>cd</sup>            | 32.8 <sup>efg</sup>        | 33.0 <sup>cd</sup>         | 32.8 <sup>def</sup>      | 32.6 <sup>f</sup>         | 32.4 <sup>g</sup>         | 33.0 <sup>cde</sup>         | 33.4 <sup>c</sup>              | 34.1 <sup>a</sup>            | 34.7 <sup>a</sup>             | 34.0 <sup>b</sup>             | 0.19  | <0.001               |
| Milk casein                                                        | 26.1 <sup>ef</sup>           | 26.0 <sup>fgh</sup>           | 25.7 <sup>ghi</sup>        | 25.8 <sup>fgh</sup>        | 25.8 <sup>fg</sup>       | 25.5 <sup>hi</sup>        | 25.4 <sup>i</sup>         | 26.1 <sup>ef</sup>          | 26.5 <sup>ec</sup>             | 27.1 <sup>b</sup>            | 27.7 <sup>a</sup>             | 26.8 <sup>bc</sup>            | 0.17  | <0.001               |
| Milk whey protein                                                  | 7.18 <sup>b</sup>            | 7.28 <sup>a</sup>             | 7.08 <sup>cd</sup>         | 7.22 <sup>ab</sup>         | 7.06 <sup>de</sup>       | 7.10 <sup>c</sup>         | 6.99 <sup>ef</sup>        | 7.00 <sup>de</sup>          | 6.94 <sup>f</sup>              | 7.02 <sup>de</sup>           | 7.04 <sup>cde</sup>           | 7.24 <sup>ab</sup>            | 0.032 | <0.001               |
| Milk lactose                                                       | 45.3 <sup>bc</sup>           | 45.2 <sup>bcd</sup>           | 45.5 <sup>a</sup>          | 45.3 <sup>b</sup>          | 45.2 <sup>b</sup>        | 45.1 <sup>cd</sup>        | 44.9 <sup>f</sup>         | 44.6 <sup>g</sup>           | 44.6 <sup>g</sup>              | 44.9 <sup>ef</sup>           | 45.0 <sup>df</sup>            | 45.0 <sup>def</sup>           | 0.09  | <0.001               |
| Urea                                                               | 0.16 <sup>d</sup>            | 0.13 <sup>fg</sup>            | 0.14 <sup>ef</sup>         | 0.12 <sup>h</sup>          | 0.12 <sup>gh</sup>       | 0.11 <sup>h</sup>         | 0.15 <sup>de</sup>        | 0.14 <sup>def</sup>         | 0.23 <sup>a</sup>              | 0.20 <sup>bc</sup>           | 0.20 <sup>b</sup>             | 0.19 <sup>c</sup>             | 0.007 | <0.001               |
| Efficiency Parameters                                              |                              |                               |                            |                            |                          |                           |                           |                             |                                |                              |                               |                               |       |                      |
| Feed efficiency (kg milk/kg DM offered)                            | 1.31 <sup>bcde</sup>         | 1.30 <sup>cde</sup>           | 1.28 <sup>e</sup>          | 1.35 <sup>abd</sup>        | 1.38 <sup>a</sup>        | 1.34 <sup>abcd</sup>      | 1.34 <sup>bcde</sup>      | 1.31 <sup>bcde</sup>        | 1.31 <sup>bcde</sup>           | 1.28 <sup>de</sup>           | 1.35 <sup>abc</sup>           | 1.32 <sup>abcde</sup>         | 0.029 | <0.001               |
| Feed non-grazing efficiency<br>(kg milk/kg non-grazing DM offered) | 1.31 <sup>e</sup>            | 1.30 <sup>e</sup>             | 1.39 <sup>e</sup>          | 2.39 <sup>b</sup>          | 2.71 <sup>a</sup>        | 2.72 <sup>a</sup>         | 2.43 <sup>b</sup>         | 2.01 <sup>c</sup>           | 1.75 <sup>d</sup>              | 1.48 <sup>d</sup>            | 1.35 <sup>e</sup>             | 1.32 <sup>e</sup>             | 0.117 | <0.001               |
| Feed concentrate efficiency<br>(kg milk/kg concentrate DM offered) | 4.21 <sup>ef</sup>           | 4.24 <sup>fedc</sup>          | 4.03 <sup>f</sup>          | 4.85 <sup>abd</sup>        | 4.91 <sup>ab</sup>       | 4.80 <sup>efcba</sup>     | 4.81 <sup>bcde</sup>      | 5.31 <sup>a</sup>           | 4.35 <sup>bcdef</sup>          | 4.31 <sup>ef</sup>           | 4.20 <sup>ef</sup>            | 4.28 <sup>edf</sup>           | 0.249 | 0.007                |
| Fat efficiency (g fat/kg DM offered)                               | 52.7 <sup>bc</sup>           | 51.2 <sup>bcde</sup>          | 50.4 <sup>de</sup>         | 52.1 <sup>bc</sup>         | 51.8 <sup>bc</sup>       | 51.1 <sup>cd</sup>        | 48.6 <sup>e</sup>         | 51.3 <sup>bcd</sup>         | 51.8 <sup>bcd</sup>            | 52.2 <sup>bc</sup>           | 55.8 <sup>a</sup>             | 53.2 <sup>b</sup>             | 1.01  | <0.001               |
| Fat non-grazing efficiency<br>(g fat/kg non-grazing DM offered)    | 52.7 <sup>e</sup>            | 51.2 <sup>e</sup>             | 55.1 <sup>e</sup>          | 91.8 <sup>b</sup>          | 102 <sup>a</sup>         | 105 <sup>a</sup>          | 91.3 <sup>b</sup>         | 79.9 <sup>c</sup>           | 69.7 <sup>d</sup>              | 60.5 <sup>e</sup>            | 55.8 <sup>e</sup>             | 53.2 <sup>e</sup>             | 4.79  | <0.001               |

|                                                                         |                     |                     |                     |                       |                       |                      |                     |                     |                     |                       |                     |                         |       |        |
|-------------------------------------------------------------------------|---------------------|---------------------|---------------------|-----------------------|-----------------------|----------------------|---------------------|---------------------|---------------------|-----------------------|---------------------|-------------------------|-------|--------|
| Fat concentrate efficiency<br>(g fat/kg concentrate DM offered)         | 170 <sup>bc</sup>   | 168 <sup>bc</sup>   | 160 <sup>c</sup>    | 187 <sup>ab</sup>     | 186 <sup>b</sup>      | 185 <sup>b</sup>     | 179 <sup>bc</sup>   | 212 <sup>a</sup>    | 174.1 <sup>bc</sup> | 176 <sup>bc</sup>     | 175 <sup>bc</sup>   | 174 <sup>bc</sup>       | 10.4  | 0.027  |
| Protein efficiency (g protein/kg DM offered)                            | 43.6 <sup>fgh</sup> | 43.4 <sup>h</sup>   | 42.0 <sup>i</sup>   | 44.7 <sup>cdefg</sup> | 45.1 <sup>dfcba</sup> | 43.7 <sup>efgh</sup> | 42.9 <sup>hi</sup>  | 43.2 <sup>ghi</sup> | 43.5 <sup>fgh</sup> | 43.8 <sup>defgh</sup> | 46.8 <sup>ca</sup>  | 44.6 <sup>bcdefgh</sup> | 0.94  | <0.001 |
| Protein non-grazing efficiency<br>(g protein/kg non-grazing DM offered) | 43.6 <sup>e</sup>   | 43.4 <sup>e</sup>   | 45.8 <sup>e</sup>   | 79.4 <sup>b</sup>     | 89.6 <sup>a</sup>     | 90.5 <sup>a</sup>    | 81.1 <sup>b</sup>   | 67.4 <sup>c</sup>   | 58.3 <sup>d</sup>   | 50.6 <sup>de</sup>    | 46.8 <sup>e</sup>   | 44.6 <sup>e</sup>       | 4.16  | <0.001 |
| Protein concentrate efficiency<br>(g protein/kg concentrate DM offered) | 140 <sup>bc</sup>   | 143 <sup>bc</sup>   | 133 <sup>c</sup>    | 160 <sup>ab</sup>     | 162 <sup>ab</sup>     | 158 <sup>b</sup>     | 158 <sup>b</sup>    | 180 <sup>a</sup>    | 145 <sup>bc</sup>   | 147 <sup>bc</sup>     | 146 <sup>bc</sup>   | 145 <sup>bc</sup>       | 8.9   | 0.014  |
| Health parameters and indicators                                        |                     |                     |                     |                       |                       |                      |                     |                     |                     |                       |                     |                         |       |        |
| Mastitis (% of herd)                                                    | 2.99 <sup>ab</sup>  | 2.17 <sup>cde</sup> | 2.53 <sup>abc</sup> | 1.92 <sup>de</sup>    | 1.81 <sup>e</sup>     | 2.30 <sup>cd</sup>   | 2.23 <sup>cde</sup> | 2.89 <sup>ab</sup>  | 2.55 <sup>bcd</sup> | 2.69 <sup>abc</sup>   | 3.07 <sup>a</sup>   | 2.24 <sup>cde</sup>     | 0.216 | <0.001 |
| Lameness (% of herd)                                                    | 2.58                | 2.23                | 2.02                | 2.52                  | 2.19                  | 2.11                 | 2.57                | 2.36                | 2.38                | 2.46                  | 2.05                | 1.96                    | 0.296 | 0.803  |
| Other disease (% of herd)                                               | 0.61 <sup>bcd</sup> | 0.56 <sup>cd</sup>  | 0.57 <sup>cd</sup>  | 0.55 <sup>cd</sup>    | 0.63 <sup>bcd</sup>   | 0.63 <sup>bcd</sup>  | 0.83 <sup>bcd</sup> | 1.16 <sup>d</sup>   | 0.80 <sup>bcd</sup> | 0.94 <sup>ab</sup>    | 0.81 <sup>abc</sup> | 0.38 <sup>d</sup>       | 0.132 | 0.032  |
| Fat:protein                                                             | 1.21 <sup>a</sup>   | 1.18 <sup>bc</sup>  | 1.21 <sup>a</sup>   | 1.17 <sup>de</sup>    | 1.15 <sup>ef</sup>    | 1.17 <sup>dc</sup>   | 1.14 <sup>f</sup>   | 1.19 <sup>ba</sup>  | 1.20 <sup>ab</sup>  | 1.20 <sup>ab</sup>    | 1.19 <sup>ab</sup>  | 1.19 <sup>ab</sup>      | 0.009 | <0.001 |
| Milk SCC (x1000/ml milk)                                                | 149 <sup>cd</sup>   | 129 <sup>ef</sup>   | 156 <sup>abcd</sup> | 151 <sup>cd</sup>     | 141 <sup>de</sup>     | 165 <sup>ac</sup>    | 149 <sup>bcd</sup>  | 160 <sup>abc</sup>  | 114 <sup>f</sup>    | 143 <sup>de</sup>     | 142 <sup>de</sup>   | 138 <sup>de</sup>       | 6.7   | <0.001 |

<sup>1</sup>n is the number of records used to calculate means  $\pm$  SE and P-values. Records with missing values were not included in the analysis.

<sup>2</sup>Significances were declared at P-value <0.05.



**Table S4.** Means  $\pm$  SE and P-values for the effect of production system (conventional, 41; Organic, 26) on the fatty acid profile of milk collected from 67 Farms across southern England

|                       | Production System   |                     | SE     | P-value <sup>2</sup> |
|-----------------------|---------------------|---------------------|--------|----------------------|
|                       | Conventional        | Organic             |        |                      |
|                       | n <sup>1</sup> =485 | n <sup>1</sup> =309 |        |                      |
| C4:0                  | 26.2                | 26.8                | 0.08   | <0.001               |
| C5:0                  | 0.26                | 0.24                | 0.003  | <0.001               |
| C6:0                  | 18.5                | 19.3                | 0.06   | <0.001               |
| C7:0                  | 0.25                | 0.23                | 0.004  | <0.001               |
| C8:0                  | 11.6                | 12.0                | 0.05   | 0.029                |
| C9:0                  | 0.32                | 0.29                | 0.005  | <0.001               |
| C10:0                 | 27.1                | 27.9                | 0.17   | 0.292                |
| C10:1 <i>c</i> 9      | 2.64                | 2.85                | 0.020  | <0.001               |
| C11:0                 | 0.59                | 0.54                | 0.010  | 0.004                |
| C11:1 <i>c</i> 10     | 0.02                | 0.02                | 0.0004 | 0.056                |
| C12:0                 | 34.0                | 34.5                | 0.24   | 0.968                |
| C13:0 iso             | 0.22                | 0.33                | 0.004  | <0.001               |
| C13:0 anteiso         | 0.09                | 0.11                | 0.001  | <0.001               |
| C12:1 <i>c</i> 9      | 0.86                | 0.87                | 0.008  | 0.841                |
| C13:0                 | 0.95                | 0.97                | 0.011  | 0.661                |
| <i>c</i> 14:0 iso     | 0.75                | 1.08                | 0.009  | <0.001               |
| C13:1                 | 0.05                | 0.05                | 0.001  | 0.942                |
| C14:0                 | 106                 | 113                 | 0.4    | <0.001               |
| C14:1 <i>t</i> 9      | 1.97                | 2.65                | 0.020  | <0.001               |
| C15:0                 | 4.15                | 4.87                | 0.0350 | <0.001               |
| C15:1 <i>c</i> 9      | 9.45                | 9.57                | 0.063  | 0.434                |
| C15:0 anteiso         | 10.2                | 11.9                | 0.08   | <0.001               |
| C16:0 iso             | 1.88                | 2.30                | 0.0170 | <0.001               |
| C16:0                 | 314                 | 309                 | 1.5    | 0.905                |
| C16:1 <i>t</i> 6-8    | 0.31                | 0.27                | 0.002  | <0.001               |
| C16:1 <i>t</i> 9      | 0.09                | 0.06                | 0.002  | <0.001               |
| C17:0 iso             | 3.47                | 4.05                | 0.036  | <0.001               |
| C16:1 <i>t</i> 11/13  | 1.99                | 1.92                | 0.017  | 0.002                |
| C16:1 + C17:0 anteiso | 18.7                | 17.3                | 0.09   | <0.001               |
| C16:1 <i>c</i> 11     | 0.93                | 1.17                | 0.018  | <0.001               |
| C16:1 <i>c</i> 13     | 1.17                | 1.23                | 0.014  | 0.199                |
| C17:0                 | 4.90                | 5.96                | 0.028  | <0.001               |
| C17:1 <i>t</i> 10     | 0.52                | 0.54                | 0.004  | 0.018                |
| C18:0 iso             | 0.41                | 0.52                | 0.008  | <0.001               |
| C17:0 <i>c</i> 9      | 1.97                | 2.28                | 0.014  | <0.001               |
| C18:0                 | 99.2                | 102                 | 0.59   | 0.080                |
| C18:1 <i>t</i> 4      | 0.20                | 0.13                | 0.003  | <0.001               |
| C18:1 <i>t</i> 5      | 0.17                | 0.11                | 0.002  | <0.001               |

---

|                                                                                                     |      |      |       |        |
|-----------------------------------------------------------------------------------------------------|------|------|-------|--------|
| C18:1 <i>t</i> 6-8                                                                                  | 3.37 | 2.37 | 0.033 | <0.001 |
| C18:1 <i>t</i> 9                                                                                    | 2.56 | 1.80 | 0.025 | <0.001 |
| C18:1 <i>t</i> 10                                                                                   | 5.79 | 3.93 | 0.105 | <0.001 |
| C18:1 <i>t</i> 11                                                                                   | 11.9 | 16.8 | 0.30  | <0.001 |
| C18:1 <i>c</i> 6/ <i>t</i> 12                                                                       | 4.90 | 3.38 | 0.043 | <0.001 |
| C18:1 <i>c</i> 9                                                                                    | 198  | 185  | 0.9   | <0.001 |
| C18:1 <i>t</i> 15                                                                                   | 3.58 | 3.10 | 0.039 | <0.001 |
| C18:1 <i>c</i> 11                                                                                   | 6.87 | 4.39 | 0.057 | <0.001 |
| C18:1 <i>c</i> 12                                                                                   | 2.66 | 1.77 | 0.040 | <0.001 |
| C18:1 <i>c</i> 13                                                                                   | 0.73 | 0.57 | 0.009 | <0.001 |
| C18:1 <i>t</i> 6 + C18:1 <i>c</i> 14                                                                | 3.60 | 3.23 | 0.026 | <0.001 |
| C19:0 + C18:1 <i>c</i> 15                                                                           | 1.56 | 1.49 | 0.014 | 0.364  |
| C18:2 <i>t</i> 11 <i>t</i> 15                                                                       | 0.19 | 0.38 | 0.008 | <0.001 |
| C18:2 <i>t</i> 9 <i>t</i> 12                                                                        | 0.05 | 0.03 | 0.001 | <0.001 |
| C18:2 <i>c</i> 8 <i>c</i> 13                                                                        | 2.39 | 1.86 | 0.024 | <0.001 |
| C18:2 <i>c</i> 10 <i>t</i> 14                                                                       | 1.11 | 1.12 | 0.014 | 0.727  |
| C18:2 <i>c</i> 9 <i>c</i> 14                                                                        | 1.40 | 1.07 | 0.010 | <0.001 |
| C18:2 <i>c</i> 9 <i>t</i> 12                                                                        | 0.68 | 0.54 | 0.005 | <0.001 |
| C18:1 <i>c</i> 16                                                                                   | 0.31 | 0.30 | 0.006 | 0.408  |
| C18:1 <i>t</i> 11 <i>c</i> 15                                                                       | 1.32 | 2.16 | 0.042 | <0.001 |
| C18:2 <i>t</i> 9 <i>c</i> 12                                                                        | 0.13 | 0.10 | 0.004 | 0.211  |
| C18:2 <i>c</i> 9 <i>c</i> 12                                                                        | 19.1 | 16.0 | 0.21  | <0.001 |
| C18:2 <i>t</i> 12 <i>c</i> 15                                                                       | 0.88 | 0.97 | 0.014 | <0.001 |
| C19:1                                                                                               | 0.17 | 0.22 | 0.003 | <0.001 |
| C20:0                                                                                               | 1.49 | 1.87 | 0.012 | <0.001 |
| C18:3 <i>c</i> 6 <i>c</i> 9 <i>c</i> 12                                                             | 0.21 | 0.19 | 0.002 | 0.031  |
| C20:1 <i>c</i> 8                                                                                    | 1.05 | 1.25 | 0.009 | <0.001 |
| C20:1 <i>c</i> 11                                                                                   | 0.54 | 0.56 | 0.013 | 0.076  |
| C18:3 <i>c</i> 9 <i>c</i> 12 <i>c</i> 15                                                            | 4.53 | 6.94 | 0.063 | <0.001 |
| CLA <i>c</i> 9 <i>t</i> 11 + <i>t</i> 7 <i>c</i> 9 + <i>t</i> 8 <i>c</i> 10 + <i>t</i> 6 <i>t</i> 8 | 5.94 | 8.00 | 0.123 | <0.001 |
| CLA other a                                                                                         | 0.22 | 0.30 | 0.002 | <0.001 |
| CLA other b                                                                                         | 0.17 | 0.40 | 0.008 | <0.001 |
| CLA other c                                                                                         | 0.14 | 0.17 | 0.002 | <0.001 |
| CLA other d                                                                                         | 0.41 | 0.38 | 0.006 | 0.031  |
| CLA other e                                                                                         | 0.22 | 0.20 | 0.001 | <0.001 |
| CLA other f                                                                                         | 0.05 | 0.04 | 0.001 | <0.001 |
| CLA other g                                                                                         | 0.12 | 0.21 | 0.004 | <0.001 |
| CLA other h                                                                                         | 0.11 | 0.16 | 0.002 | <0.001 |
| C20:2 <i>c</i> 11 <i>c</i> 14                                                                       | 0.20 | 0.20 | 0.002 | 0.311  |
| C22:0                                                                                               | 0.51 | 0.85 | 0.007 | <0.001 |
| C20:3 <i>c</i> 8 <i>c</i> 11 <i>c</i> 14                                                            | 0.87 | 0.71 | 0.007 | <0.001 |
| C22:1 <i>c</i> 13                                                                                   | 0.16 | 0.55 | 0.023 | <0.001 |
| C20:3 <i>c</i> 11 <i>c</i> 14 <i>c</i> 17                                                           | 0.07 | 0.13 | 0.002 | <0.001 |

---

|                               |      |      |       |        |
|-------------------------------|------|------|-------|--------|
| C20:4 c5c8c11c14              | 1.11 | 0.96 | 0.009 | <0.001 |
| C22:2 c13c16                  | 0.34 | 0.44 | 0.006 | <0.001 |
| C20:5 c5c8c11c14c17 (EPA)     | 0.44 | 0.66 | 0.006 | <0.001 |
| C24:0                         | 0.35 | 0.52 | 0.004 | <0.001 |
| C24:1 c15                     | 0.06 | 0.10 | 0.002 | <0.001 |
| C22:3 c13c16c19               | 0.08 | 0.12 | 0.003 | <0.001 |
| C22:4 c7c10c13c16             | 0.05 | 0.07 | 0.001 | <0.001 |
| C22:5 c7c10c13c16c19 (DPA)    | 0.74 | 1.05 | 0.007 | <0.001 |
| C22:6 c4 c7c10c13c16c19 (DHA) | 0.05 | 0.07 | 0.001 | <0.001 |

<sup>1</sup>n is the number of records used to calculate means. Records with missing data were not included in the means  $\pm$  SE and P-values calculations.

<sup>2</sup>Significances were declared at  $P < 0.05$

---

**Table S5.** Means  $\pm$  SE and P-values for the FA profile of milk from 67 herds with two differing production systems (Conventional and organic) in Southern England between January and December (2019)

|                                                                                           | Month                        |                               |                            |                            |                          |                           |                           |                             |                                |                              |                               |                               |       |                          |
|-------------------------------------------------------------------------------------------|------------------------------|-------------------------------|----------------------------|----------------------------|--------------------------|---------------------------|---------------------------|-----------------------------|--------------------------------|------------------------------|-------------------------------|-------------------------------|-------|--------------------------|
|                                                                                           | January<br>n=65 <sup>1</sup> | February<br>n=65 <sup>1</sup> | March<br>n=66 <sup>1</sup> | April<br>n=67 <sup>1</sup> | May<br>n=67 <sup>1</sup> | June<br>n=67 <sup>1</sup> | July<br>n=67 <sup>1</sup> | August<br>n=67 <sup>1</sup> | September<br>n=67 <sup>1</sup> | October<br>n=66 <sup>1</sup> | November<br>n=65 <sup>1</sup> | December<br>n=65 <sup>1</sup> | SE    | P-<br>Value <sup>2</sup> |
| Individual FA (g/kg total FA)                                                             |                              |                               |                            |                            |                          |                           |                           |                             |                                |                              |                               |                               |       |                          |
| SFA                                                                                       |                              |                               |                            |                            |                          |                           |                           |                             |                                |                              |                               |                               |       |                          |
| C4:0                                                                                      | 26.5 <sup>ba</sup>           | 26.6 <sup>bc</sup>            | 27.2 <sup>a</sup>          | 26.6 <sup>b</sup>          | 26.4 <sup>bc</sup>       | 26.0 <sup>cd</sup>        | 27.5 <sup>a</sup>         | 27.1 <sup>a</sup>           | 26.8 <sup>b</sup>              | 25.4 <sup>e</sup>            | 25.0 <sup>f</sup>             | 25.7 <sup>de</sup>            | 2.34  | <0.001                   |
| C6:0                                                                                      | 18.9 <sup>bc</sup>           | 18.8 <sup>bc</sup>            | 18.8 <sup>bc</sup>         | 18.6 <sup>bc</sup>         | 18.2 <sup>d</sup>        | 17.9 <sup>e</sup>         | 18.9 <sup>bc</sup>        | 18.8 <sup>bc</sup>          | 18.9 <sup>bc</sup>             | 19.1 <sup>bab</sup>          | 19.0 <sup>b</sup>             | 19.3 <sup>a</sup>             | 1.65  | <0.001                   |
| C8:0                                                                                      | 11.8 <sup>bcdef</sup>        | 11.7 <sup>bcdef</sup>         | 11.6 <sup>cdef</sup>       | 11.7 <sup>bd</sup>         | 11.4 <sup>ef</sup>       | 11.1 <sup>g</sup>         | 11.5 <sup>f</sup>         | 11.5 <sup>def</sup>         | 11.7 <sup>bce</sup>            | 12.3 <sup>a</sup>            | 12.4 <sup>a</sup>             | 12.4 <sup>a</sup>             | 1.05  | <0.001                   |
| C10:0                                                                                     | 27.7 <sup>c</sup>            | 27.4 <sup>cd</sup>            | 26.9 <sup>de</sup>         | 27.4 <sup>c</sup>          | 27.0 <sup>cd</sup>       | 25.7 <sup>e</sup>         | 25.9 <sup>e</sup>         | 26.0 <sup>e</sup>           | 26.7 <sup>cd</sup>             | 28.9 <sup>b</sup>            | 29.6 <sup>a</sup>             | 29.5 <sup>ab</sup>            | 2.52  | <0.001                   |
| C12:0                                                                                     | 35.0 <sup>c</sup>            | 34.5 <sup>c</sup>             | 33.6 <sup>def</sup>        | 34.0 <sup>c</sup>          | 33.2 <sup>cde</sup>      | 31.7 <sup>g</sup>         | 32.2 <sup>fg</sup>        | 32.6 <sup>efg</sup>         | 33.6 <sup>cd</sup>             | 36.3 <sup>b</sup>            | 37.2 <sup>a</sup>             | 36.8 <sup>ab</sup>            | 3.20  | <0.001                   |
| C14:0                                                                                     | 112 <sup>cd</sup>            | 110 <sup>d</sup>              | 107 <sup>e</sup>           | 105 <sup>g</sup>           | 106 <sup>efg</sup>       | 104 <sup>fg</sup>         | 106 <sup>eg</sup>         | 106 <sup>efg</sup>          | 107 <sup>e</sup>               | 113 <sup>bc</sup>            | 115 <sup>a</sup>              | 114 <sup>ab</sup>             | 9.80  | <0.001                   |
| C16:0                                                                                     | 321 <sup>c</sup>             | 315 <sup>d</sup>              | 306 <sup>ef</sup>          | 287 <sup>i</sup>           | 295 <sup>h</sup>         | 300 <sup>g</sup>          | 306 <sup>f</sup>          | 313 <sup>de</sup>           | 313 <sup>de</sup>              | 330 <sup>ab</sup>            | 334 <sup>a</sup>              | 327 <sup>b</sup>              | 28.2  | <0.001                   |
| C18:0                                                                                     | 98.5 <sup>e</sup>            | 101 <sup>dc</sup>             | 106 <sup>ba</sup>          | 106 <sup>ab</sup>          | 105 <sup>ab</sup>        | 107 <sup>a</sup>          | 103 <sup>cb</sup>         | 99.9 <sup>ed</sup>          | 99.2 <sup>ed</sup>             | 92.8 <sup>gf</sup>           | 91.4 <sup>g</sup>             | 95.2 <sup>f</sup>             | 10.16 | <0.001                   |
| MUFA                                                                                      |                              |                               |                            |                            |                          |                           |                           |                             |                                |                              |                               |                               |       |                          |
| VA (C18:1 <i>n</i> 11)                                                                    | 11.2 <sup>def</sup>          | 11.4 <sup>def</sup>           | 12.2 <sup>de</sup>         | 19.3 <sup>a</sup>          | 19.0 <sup>a</sup>        | 16.1 <sup>b</sup>         | 15.4 <sup>b</sup>         | 13.6 <sup>c</sup>           | 13.5 <sup>c</sup>              | 11.8 <sup>d</sup>            | 11.0 <sup>ef</sup>            | 10.6 <sup>f</sup>             | 1.90  | <0.001                   |
| OA (C18:1 <i>c</i> 9)                                                                     | 189 <sup>h</sup>             | 191 <sup>hg</sup>             | 197 <sup>fed</sup>         | 204 <sup>ab</sup>          | 202 <sup>bce</sup>       | 206 <sup>a</sup>          | 198 <sup>cdef</sup>       | 198 <sup>ef</sup>           | 196 <sup>gf</sup>              | 181 <sup>i</sup>             | 177 <sup>j</sup>              | 179 <sup>ij</sup>             | 19.2  | <0.001                   |
| PUFA                                                                                      |                              |                               |                            |                            |                          |                           |                           |                             |                                |                              |                               |                               |       |                          |
| LA (18:2 <i>c</i> 9 <i>c</i> 12)                                                          | 18.4 <sup>cdef</sup>         | 18.8 <sup>be</sup>            | 19.2 <sup>a</sup>          | 18.4 <sup>bce</sup>        | 17.8 <sup>def</sup>      | 17.8 <sup>def</sup>       | 17.0 <sup>h</sup>         | 16.0 <sup>gh</sup>          | 17.5 <sup>fh</sup>             | 17.5 <sup>fgh</sup>          | 17.7 <sup>efh</sup>           | 17.9 <sup>efgh</sup>          | 2.00  | <0.001                   |
| RA                                                                                        | 5.59 <sup>de</sup>           | 5.7 <sup>de</sup>             | 5.80 <sup>de</sup>         | 8.44 <sup>a</sup>          | 8.80 <sup>a</sup>        | 7.76 <sup>b</sup>         | 7.56 <sup>bc</sup>        | 7.27 <sup>c</sup>           | 7.17 <sup>c</sup>              | 5.95 <sup>d</sup>            | 5.44 <sup>e</sup>             | 5.24 <sup>e</sup>             | 0.905 | <0.001                   |
| ALNA (18:3 <i>c</i> 9 <i>c</i> 12 <i>c</i> 15)                                            | 4.68 <sup>fe</sup>           | 4.92 <sup>df</sup>            | 5.11 <sup>d</sup>          | 6.60 <sup>a</sup>          | 6.08 <sup>b</sup>        | 6.06 <sup>b</sup>         | 6.01 <sup>b</sup>         | 6.01 <sup>b</sup>           | 5.64 <sup>c</sup>              | 4.91 <sup>def</sup>          | 4.86 <sup>efd</sup>           | 4.66 <sup>f</sup>             | 0.692 | 0.003                    |
| EPA (20:5 <i>c</i> 5 <i>c</i> 8 <i>c</i> 11 <i>c</i> 14 <i>c</i> 17)                      | 0.42 <sup>h</sup>            | 0.47 <sup>g</sup>             | 0.47 <sup>g</sup>          | 0.55 <sup>cd</sup>         | 0.57 <sup>b</sup>        | 0.52 <sup>f</sup>         | 0.60 <sup>a</sup>         | 0.57 <sup>bc</sup>          | 0.58 <sup>b</sup>              | 0.54 <sup>d</sup>            | 0.51 <sup>e</sup>             | 0.49 <sup>fg</sup>            | 0.061 | <0.001                   |
| DPA (C22:5 <i>c</i> 7 <i>c</i> 10 <i>c</i> 13 <i>c</i> 16 <i>c</i> 19)                    | 0.79 <sup>d</sup>            | 0.79 <sup>d</sup>             | 0.76 <sup>e</sup>          | 0.79 <sup>d</sup>          | 0.90 <sup>b</sup>        | 0.91 <sup>b</sup>         | 0.96 <sup>a</sup>         | 0.91 <sup>b</sup>           | 0.92 <sup>b</sup>              | 0.90 <sup>b</sup>            | 0.87 <sup>c</sup>             | 0.84 <sup>c</sup>             | 0.100 | <0.001                   |
| DHA( <i>c</i> 22:6 <i>c</i> 4 <i>c</i> 7 <i>c</i> 10 <i>c</i> 13 <i>c</i> 16 <i>c</i> 19) | 0.05 <sup>f</sup>            | 0.06 <sup>fe</sup>            | 0.05 <sup>gh</sup>         | 0.04 <sup>h</sup>          | 0.05 <sup>g</sup>        | 0.04 <sup>gh</sup>        | 0.06 <sup>ce</sup>        | 0.06 <sup>ef</sup>          | 0.07 <sup>ab</sup>             | 0.07 <sup>ab</sup>           | 0.07 <sup>a</sup>             | 0.07 <sup>ab</sup>            | 0.007 | 0.001                    |
| FA groups (g/kg total FA)                                                                 |                              |                               |                            |                            |                          |                           |                           |                             |                                |                              |                               |                               |       |                          |
| SFA <sup>3</sup>                                                                          | 694 <sup>c</sup>             | 689 <sup>d</sup>              | 679 <sup>e</sup>           | 659 <sup>g</sup>           | 665 <sup>f</sup>         | 667 <sup>f</sup>          | 676 <sup>e</sup>          | 679 <sup>e</sup>            | 680 <sup>ed</sup>              | 701 <sup>b</sup>             | 707 <sup>a</sup>              | 704 <sup>ab</sup>             | 58.9  | 0.001                    |
| MUFA <sup>4</sup>                                                                         | 264 <sup>e</sup>             | 268 <sup>d</sup>              | 277 <sup>c</sup>           | 292 <sup>a</sup>           | 287 <sup>b</sup>         | 287 <sup>b</sup>          | 279 <sup>c</sup>          | 277 <sup>c</sup>            | 276 <sup>cd</sup>              | 257 <sup>f</sup>             | 251 <sup>g</sup>              | 255 <sup>gf</sup>             | 26.6  | <0.001                   |
| <i>cis</i> MUFA <sup>6</sup>                                                              | 231 <sup>e</sup>             | 234 <sup>de</sup>             | 240 <sup>bc</sup>          | 247 <sup>a</sup>           | 244 <sup>b</sup>         | 247 <sup>a</sup>          | 240 <sup>cbd</sup>        | 240 <sup>cbd</sup>          | 239 <sup>cd</sup>              | 224 <sup>f</sup>             | 220 <sup>g</sup>              | 222 <sup>fg</sup>             | 22.8  | <0.001                   |

|                                                        |                     |                      |                    |                     |                     |                      |                     |                     |                     |                     |                     |                     |       |        |
|--------------------------------------------------------|---------------------|----------------------|--------------------|---------------------|---------------------|----------------------|---------------------|---------------------|---------------------|---------------------|---------------------|---------------------|-------|--------|
| <i>trans</i> MUFA <sup>7</sup>                         | 32.5 <sup>fgh</sup> | 34.4 <sup>f</sup>    | 37.1 <sup>d</sup>  | 45.0 <sup>a</sup>   | 43.4 <sup>b</sup>   | 39.6 <sup>c</sup>    | 39.1 <sup>c</sup>   | 36.7 <sup>d</sup>   | 36.8 <sup>d</sup>   | 32.9 <sup>gf</sup>  | 31.3 <sup>h</sup>   | 32.3 <sup>hg</sup>  | 4.11  | <0.001 |
| PUFA <sup>5</sup>                                      | 42.2 <sup>gh</sup>  | 43.7 <sup>eg</sup>   | 44.8 <sup>de</sup> | 52.9 <sup>a</sup>   | 52.1 <sup>a</sup>   | 48.8 <sup>b</sup>    | 47.5 <sup>bc</sup>  | 47.1 <sup>cd</sup>  | 45.81 <sup>de</sup> | 41.7 <sup>gh</sup>  | 40.3 <sup>h</sup>   | 41.1 <sup>h</sup>   | 0.69  | <0.001 |
| <i>cis</i> PUFA <sup>8</sup>                           | 27.3 <sup>cde</sup> | 28.0 <sup>bde</sup>  | 28.4 <sup>ab</sup> | 29.2 <sup>a</sup>   | 28.1 <sup>b</sup>   | 28.1 <sup>bc</sup>   | 27.7 <sup>bcd</sup> | 27.3 <sup>bcd</sup> | 27.5 <sup>bcd</sup> | 26.8 <sup>e</sup>   | 27.0 <sup>de</sup>  | 27.0 <sup>de</sup>  | 0.54  | <0.001 |
| <i>trans</i> PUFA <sup>9</sup>                         | 0.22 <sup>fg</sup>  | 0.24 <sup>fg</sup>   | 0.26 <sup>ef</sup> | 0.50 <sup>a</sup>   | 0.47 <sup>b</sup>   | 0.37 <sup>c</sup>    | 0.34 <sup>d</sup>   | 0.33 <sup>d</sup>   | 0.30 <sup>e</sup>   | 0.24 <sup>f</sup>   | 0.21 <sup>g</sup>   | 0.21 <sup>fg</sup>  | 0.048 | <0.001 |
| <i>cis,trans</i> + <i>trans,cis</i> PUFA <sup>10</sup> | 14.5 <sup>def</sup> | 14.7 <sup>de</sup>   | 15.1 <sup>d</sup>  | 19.4 <sup>a</sup>   | 19.5 <sup>a</sup>   | 17.7 <sup>b</sup>    | 17.5 <sup>b</sup>   | 17.0 <sup>bc</sup>  | 16.4 <sup>c</sup>   | 14.7 <sup>d</sup>   | 14.0 <sup>ef</sup>  | 13.7 <sup>f</sup>   | 0.41  | <0.001 |
| n-3 <sup>11</sup>                                      | 8.55 <sup>gh</sup>  | 8.66 <sup>gh</sup>   | 9.24 <sup>f</sup>  | 12.0 <sup>a</sup>   | 11.3 <sup>bd</sup>  | 10.9 <sup>cd</sup>   | 11.3 <sup>bc</sup>  | 10.9 <sup>d</sup>   | 10.2 <sup>e</sup>   | 9.00 <sup>fg</sup>  | 8.60 <sup>h</sup>   | 8.39 <sup>h</sup>   | 0.347 | <0.001 |
| n-6 <sup>12</sup>                                      | 31.8                | 31.7                 | 31.5               | 30.4                | 29.9                | 30.0                 | 29.8                | 30.1                | 30.6                | 31.5                | 32.0                | 31.7                | 0.620 | 0.119  |
| <i>cis</i> n-3 PUFA <sup>13</sup>                      | 6.13 <sup>e</sup>   | 6.42 <sup>d</sup>    | 6.57 <sup>d</sup>  | 8.16 <sup>a</sup>   | 7.77 <sup>b</sup>   | 7.71 <sup>bc</sup>   | 7.85 <sup>ab</sup>  | 7.72 <sup>b</sup>   | 7.39 <sup>c</sup>   | 6.60 <sup>d</sup>   | 6.47 <sup>de</sup>  | 6.28 <sup>de</sup>  | 0.243 | <0.001 |
| <i>cis</i> n-6 PUFA <sup>14</sup>                      | 21.1                | 21.5                 | 21.8               | 21.0                | 20.3                | 20.3                 | 19.7                | 19.5                | 20.0                | 20.1                | 20.5                | 20.7                | 0.606 | 0.163  |
| n-3:n-6 ratio                                          | 0.28 <sup>ef</sup>  | 0.28 <sup>ef</sup>   | 0.31 <sup>ef</sup> | 0.42 <sup>a</sup>   | 0.40 <sup>ac</sup>  | 0.38 <sup>c</sup>    | 0.40 <sup>a</sup>   | 0.37 <sup>c</sup>   | 0.35 <sup>d</sup>   | 0.30 <sup>e</sup>   | 0.28 <sup>f</sup>   | 0.27 <sup>ef</sup>  | 0.029 | <0.001 |
| n-6:n-3 ratio                                          | 4.13 <sup>ab</sup>  | 4.02 <sup>ab</sup>   | 3.68 <sup>c</sup>  | 2.89 <sup>g</sup>   | 3.00 <sup>fg</sup>  | 3.01 <sup>defg</sup> | 2.87 <sup>g</sup>   | 3.00 <sup>efg</sup> | 3.23 <sup>df</sup>  | 3.78 <sup>bc</sup>  | 3.96 <sup>ab</sup>  | 4.12 <sup>a</sup>   | 0.119 | <0.001 |
| EPA+DHA                                                | 0.47 <sup>h</sup>   | 0.52 <sup>g</sup>    | 0.51 <sup>g</sup>  | 0.59 <sup>de</sup>  | 0.62 <sup>bc</sup>  | 0.56 <sup>f</sup>    | 0.67 <sup>a</sup>   | 0.62 <sup>bc</sup>  | 0.65 <sup>b</sup>   | 0.61 <sup>cd</sup>  | 0.58 <sup>ef</sup>  | 0.56 <sup>ef</sup>  | 0.067 | <0.001 |
| <i>trans</i> FA <sup>15</sup>                          | 33.9 <sup>fgh</sup> | 35.8 <sup>f</sup>    | 38.6 <sup>d</sup>  | 46.9 <sup>a</sup>   | 45.3 <sup>b</sup>   | 41.3 <sup>c</sup>    | 40.6 <sup>c</sup>   | 38.2 <sup>d</sup>   | 38.2 <sup>d</sup>   | 34.2 <sup>fg</sup>  | 32.7 <sup>h</sup>   | 33.5 <sup>gh</sup>  | 0.86  | <0.001 |
| <i>trans</i> FA (exc. VA)                              | 22.7 <sup>ef</sup>  | 24.4 <sup>d</sup>    | 26.4 <sup>c</sup>  | 27.6 <sup>a</sup>   | 26.2 <sup>b</sup>   | 25.2 <sup>cd</sup>   | 25.1 <sup>cd</sup>  | 24.5 <sup>d</sup>   | 24.7 <sup>d</sup>   | 22.4 <sup>ef</sup>  | 21.7 <sup>f</sup>   | 23.0 <sup>e</sup>   | 0.56  | <0.001 |
| Human health related indices                           |                     |                      |                    |                     |                     |                      |                     |                     |                     |                     |                     |                     |       |        |
| AI <sup>16</sup>                                       | 2.65 <sup>c</sup>   | 2.56 <sup>d</sup>    | 2.42 <sup>e</sup>  | 2.18 <sup>g</sup>   | 2.25 <sup>f</sup>   | 2.27 <sup>f</sup>    | 2.37 <sup>e</sup>   | 2.42 <sup>e</sup>   | 2.45 <sup>de</sup>  | 2.78 <sup>b</sup>   | 2.88 <sup>a</sup>   | 2.82 <sup>ab</sup>  | 0.041 | <0.001 |
| TI <sup>17</sup>                                       | 3.04 <sup>c</sup>   | 2.97 <sup>d</sup>    | 2.83 <sup>e</sup>  | 2.50 <sup>i</sup>   | 2.60 <sup>h</sup>   | 2.64 <sup>gh</sup>   | 2.70 <sup>fg</sup>  | 2.76 <sup>ef</sup>  | 2.80 <sup>e</sup>   | 3.10 <sup>bc</sup>  | 3.19 <sup>a</sup>   | 3.16 <sup>ba</sup>  | 0.036 | <0.001 |
| HH <sup>18</sup>                                       | 0.50 <sup>f</sup>   | 0.51 <sup>e</sup>    | 0.54 <sup>cd</sup> | 0.60 <sup>a</sup>   | 0.58 <sup>b</sup>   | 0.58 <sup>ab</sup>   | 0.55 <sup>c</sup>   | 0.54 <sup>cd</sup>  | 0.53 <sup>de</sup>  | 0.47 <sup>g</sup>   | 0.45 <sup>h</sup>   | 0.46 <sup>gh</sup>  | 0.009 | <0.001 |
| $\Delta^9$ -desaturase activity indicators             |                     |                      |                    |                     |                     |                      |                     |                     |                     |                     |                     |                     |       |        |
| $\Delta^9$ I <sup>19</sup>                             | 0.27 <sup>e</sup>   | 0.27 <sup>d</sup>    | 0.28 <sup>c</sup>  | 0.29 <sup>a</sup>   | 0.29 <sup>b</sup>   | 0.29 <sup>ab</sup>   | 0.28 <sup>c</sup>   | 0.28 <sup>c</sup>   | 0.28 <sup>cd</sup>  | 0.26 <sup>f</sup>   | 0.25 <sup>g</sup>   | 0.26 <sup>fg</sup>  | 0.027 | <0.001 |
| C14:1:C14:0                                            | 0.02 <sup>f</sup>   | 0.02 <sup>e</sup>    | 0.02 <sup>ef</sup> | 0.02 <sup>cd</sup>  | 0.02 <sup>cd</sup>  | 0.02 <sup>b</sup>    | 0.02 <sup>a</sup>   | 0.02 <sup>bc</sup>  | 0.02 <sup>de</sup>  | 0.02 <sup>g</sup>   | 0.02 <sup>h</sup>   | 0.02 <sup>gh</sup>  | 0.002 | <0.001 |
| C16:1:C16:0                                            | 0.03 <sup>fg</sup>  | 0.03 <sup>defg</sup> | 0.03 <sup>ce</sup> | 0.03 <sup>a</sup>   | 0.03 <sup>a</sup>   | 0.03 <sup>a</sup>    | 0.03 <sup>b</sup>   | 0.03 <sup>b</sup>   | 0.03 <sup>b</sup>   | 0.03 <sup>cdf</sup> | 0.03 <sup>efg</sup> | 0.03 <sup>g</sup>   | 0.003 | 0.003  |
| OA:C18:0                                               | 1.92 <sup>bcd</sup> | 1.90 <sup>cd</sup>   | 1.88 <sup>e</sup>  | 1.93 <sup>bcd</sup> | 1.94 <sup>bcd</sup> | 1.94 <sup>bcd</sup>  | 1.93 <sup>cde</sup> | 1.99 <sup>a</sup>   | 1.99 <sup>a</sup>   | 1.96 <sup>ab</sup>  | 1.94 <sup>abc</sup> | 1.89 <sup>de</sup>  | 0.183 | <0.001 |
| RA:VA                                                  | 0.17 <sup>bc</sup>  | 0.17 <sup>bc</sup>   | 0.16 <sup>de</sup> | 0.15 <sup>f</sup>   | 0.16 <sup>e</sup>   | 0.16 <sup>cd</sup>   | 0.16 <sup>bcd</sup> | 0.18 <sup>a</sup>   | 0.18 <sup>a</sup>   | 0.17 <sup>b</sup>   | 0.17 <sup>bc</sup>  | 0.17 <sup>bcd</sup> | 0.015 | <0.001 |

<sup>1</sup> n is the number of records used to calculate means.

<sup>2</sup> Significances were declared at P < 0.05.

<sup>3</sup>SFA: C4:0, C5:0, C6:0, C7:0, C8:0, C9:0, C10:0, C11:0, C12:0, C13:0, C14:0, C15:0, C16:0, C17:0, C18:0, C20:0, C22:0, C24:0.

<sup>4</sup>MUFA: C10:1 *c*9, C11:1 *c*10, C12:1 *c*9, C13:1, C14:1 *t*9, C15:1 *c*9, C16:1 *t*6-8, C16:1 *t*9, C16:1 *t*11+*t*12+*t*13, C16:1 (co-elutes with C17:0 anteiso, C16:1 *c*11, C16:1 *c*13, C17:1 *t*10, C17:1 *c*9, C18:1 *t*4, C18:1 *t*5, C18:1 *t*6-8, C18:1 *t*9, C18:1 *t*10, C18:1 *t*11 (VA), C18:1 *c*6+*t*12, C18:1 *c*9 (OA), C18:1 *t*15, C18:1 *c*11, C18:1 *c*12, C18:1 *c*13, C18:1 *c*14 (co-elutes with C18:1

---

t6), C18:1 c15 (co-elutes with C19:0), C18:1 c16, C19:1, C20:1 c8, C20:1 c11, C22:1 c13, C24:1 c15.

<sup>5</sup>PUFA: C18:2 t11t15, C18:2 t9t12, C18:2 c9t13, C18:2 c10t14, C18:2 c9t14, C18:2 c9t12, C18:2 t11c15, C18:2 t9c12, C18:2 c9c12 (LA), C18:2 t12c15, C18:3 c6c9c12, C18:3 c9c12c15 (ALNA), 18:2 c9t11 conjugated (RA) (co-elutes with C18:2 t7c9 + t8c10 + t6c8), other conjugated FA of unknown isomerisms of C18:2, C20:2 c11c14, C20:3 c8c11c14, C20:3 c11c14c17, C20:4 c5c8c11c14, C22:2 c13c16, C20:5 c5c8c11c14c17 (EPA), C22:3 c13c16c19, C22:4 c7c10c16c19, C22:5 c7c10c13c16c19 (DPA), C22:6 c4c7c10c13c16c19 (DHA).

<sup>6</sup>cisMUFA: C10:1 c9, C11:1 c10, C12:1 c9, C13:1 c9, C14:1 c9, C16:2 c9 (co-elutes with C17:0 anteiso), C16:1 c11, C16:1 c13, C17:1 c9, C18:1 c6 (co-elutes with C18:1 t16), C18:1 c9 (OA), C18:1 c11, C18:1 c12, C18:1 c13, C18:1 c14 (co-elutes with C18:1 t6), C18:1 c15 (co-elutes with C19:0), C18:1 c16, c19:1 c9, C20:1 c8, C20:1 c11, C22:1 c13, C24:1 c15.

<sup>7</sup>transMUFA: C14:1 t9, C16:1 t6+t7+t8, C16:1 t9, C16:1 t11+t12+t13, C17:1 t10, C18:1 t4, C18:1 t5, C18:1 t6+t7+t8, C18:1 t9, C18:1 t10, C18:1 t11 (VA), C18:1 t12 (co-elutes with C18:1 c6), C18:1 t15, C18:1 t16 (co-elutes with C18:1 c14).

<sup>8</sup>cisPUFA: C18:2 c9c12 (LA), C18:3 c6c9c12, C18:3 c9c12c15 (ALNA), 20:2 c11c14, C20:3 c8c11c14, C20:3 c11c14c17, C20:4 c5c8c11c14, C22:3 c13c16, C20:5 c5c8c11c14c17 (EPA), C22:3 c13c16c19, C22:4 c7c10c13c16, C22:5 c7c10c13c16c19 (DPA), C22:6 c4c7c10c13c16c19 (DHA).

<sup>9</sup>transPUFA: C18:2 t11t15, C18:2 t9t12.

<sup>10</sup>cis,trans+trans,cis PUFA: C18:2 c9t13, C18:2 c10t14, C18:2 c9t14, C18:2 c9t12, C18:2 t11c15, C18:2 t9c12, C18:2 t12c15, C18:2 c9t11 (RA) (co-elutes with C18:2 t7c9 + t8c10 + t6c8), other conjugated FA of unknown isomerism (CLA other a-h).

<sup>11</sup>omega-3 PUFA (n-3): C18:2 t11t15, C18:2 t11c15, C18:2 t12c15, C18:3 c9c12c15, C20:3 c11c14c17, C20:5 c5c8c11c14c17 (EPA), C22:3 c13c16c19, C22:5 c7c10c13c16c19 (DPA), C22:6 c4c7c10c13c16c19.

<sup>12</sup>omega-6 PUFA(n-6): C18:2 t9t12, C18:2 c9t12, C18:2 t9c12, C18:2 c9c12 (LA), C18:3 c6c9c12, C20:2 c11c14, C20:3 c8c11c14, C20:4 c5c8c11c14, C22:2 c13c16, C22:4 c7c10c13c16.

<sup>13</sup>Cis n-3 PUFA: C18:3 c9c12c15, C20:3 c11 c14 C17, C20:5 c5c8c11c14c17, C22:3 c13c16c19, C22:5 c7c10c13c16c19, C22:6 c4c7c10c13c16c19.

<sup>14</sup>Cisn-6 PUFA: C18:2 c9c12, C18:3 c6c9c12, C20:2 c11c14, C20:4 c5c8c11c14, C22:2 c13c16.

<sup>15</sup>transFA: C14:1 t9, C16:1 t6+t7+t8, C16:1 t9, C16:1 t11+t12+t13, C17:1 t10, C18:1 t4, C18:1 t5, C18:1 t6+t7+t8, C18:1 t9, C18:1 t10, C18:1 t11 (VA), C18:1 t12 (co-elutes with C18:1 c6), C18:1 t15, C18:1 t16 (co-elutes with C18:1 c14), C18:2 t11t15, C18:2 t9t12.

<sup>16</sup>Atherogenicity index = (C12:0 + (4 × C14:0) + C16:0) / (MUFA + PUFA), as described in Średnicka-Tober, *et al.* [3].

<sup>17</sup>Thrombogenicity index = (C14:0 + C16:0 + C18:0) / (0.5 × MUFA) + (0.5 × n-6) + (3 × n-3) + (n-3:n-6) as described in Średnicka-Tober, *et al.* [3].

<sup>18</sup>Hypocholesterolemic to hypercholesterolemic ratio = (C18:1 c9 + total PUFA) / (C12:0 + C14:0 + C16:0) as described in Mierlita [4].

<sup>19</sup>Δ9-desaturase activity index = (c9 C14:1 + c9 C16:1 + OA + RA) / (c9 C14:1 + c9 C16:1 + OA + RA + C14:0 + C16:0 + C18:0 + VA) as described in Kay, *et al.* [5].

---

**Table S6.** Means  $\pm$  SE and P-values for the FA profile of milk from 67 farms with two differing production systems (Conventional and organic) in Southern England between January and December (2019)

|                    | Month                        |                               |                            |                            |                          |                           |                           |                             |                                |                              |                               |                               | SE    | P-Value <sup>2</sup> |
|--------------------|------------------------------|-------------------------------|----------------------------|----------------------------|--------------------------|---------------------------|---------------------------|-----------------------------|--------------------------------|------------------------------|-------------------------------|-------------------------------|-------|----------------------|
|                    | January<br>n=65 <sup>1</sup> | February<br>n=67 <sup>1</sup> | March<br>n=67 <sup>1</sup> | April<br>n=67 <sup>1</sup> | May<br>n=67 <sup>1</sup> | June<br>n=67 <sup>1</sup> | July<br>n=67 <sup>1</sup> | August<br>n=67 <sup>1</sup> | September<br>n=67 <sup>1</sup> | October<br>n=67 <sup>1</sup> | November<br>n=67 <sup>1</sup> | December<br>n=65 <sup>1</sup> |       |                      |
| C4:0               | 26.5 <sup>bc</sup>           | 26.6 <sup>bc</sup>            | 27.2 <sup>a</sup>          | 26.6 <sup>b</sup>          | 26.4 <sup>bc</sup>       | 26.0 <sup>cd</sup>        | 27.5 <sup>a</sup>         | 27.1 <sup>a</sup>           | 26.8 <sup>b</sup>              | 25.4 <sup>e</sup>            | 25.0 <sup>f</sup>             | 25.8 <sup>de</sup>            | 2.32  | <0.001               |
| C5:0               | 0.27 <sup>b</sup>            | 0.26 <sup>bd</sup>            | 0.25 <sup>cde</sup>        | 0.26 <sup>bcd</sup>        | 0.24 <sup>fg</sup>       | 0.20 <sup>h</sup>         | 0.24 <sup>g</sup>         | 0.25 <sup>def</sup>         | 0.24 <sup>efg</sup>            | 0.26 <sup>b</sup>            | 0.29 <sup>a</sup>             | 0.28 <sup>a</sup>             | 0.022 | <0.001               |
| C6:0               | 18.9 <sup>bc</sup>           | 18.8 <sup>bc</sup>            | 18.8 <sup>bc</sup>         | 18.6 <sup>c</sup>          | 18.2 <sup>d</sup>        | 17.9 <sup>e</sup>         | 18.9 <sup>bc</sup>        | 18.8 <sup>bc</sup>          | 18.9 <sup>bc</sup>             | 19.1 <sup>ab</sup>           | 19.0 <sup>b</sup>             | 19.3 <sup>a</sup>             | 1.63  | <0.001               |
| C7:0               | 0.25 <sup>de</sup>           | 0.24 <sup>ef</sup>            | 0.23 <sup>efg</sup>        | 0.25 <sup>cd</sup>         | 0.22 <sup>g</sup>        | 0.17 <sup>i</sup>         | 0.20 <sup>h</sup>         | 0.21 <sup>g</sup>           | 0.22 <sup>fg</sup>             | 0.27 <sup>c</sup>            | 0.31 <sup>a</sup>             | 0.30 <sup>b</sup>             | 0.021 | <0.001               |
| C8:0               | 11.8 <sup>bcdef</sup>        | 11.7 <sup>bcdef</sup>         | 11.6 <sup>cdef</sup>       | 11.7 <sup>bd</sup>         | 11.4 <sup>ef</sup>       | 11.1 <sup>g</sup>         | 11.5 <sup>f</sup>         | 11.5 <sup>def</sup>         | 11.7 <sup>bce</sup>            | 12.3 <sup>a</sup>            | 12.4 <sup>a</sup>             | 12.4 <sup>a</sup>             | 1.04  | <0.001               |
| C9:0               | 0.32 <sup>cd</sup>           | 0.32 <sup>cd</sup>            | 0.29 <sup>ef</sup>         | 0.32 <sup>c</sup>          | 0.29 <sup>de</sup>       | 0.23 <sup>g</sup>         | 0.25 <sup>g</sup>         | 0.27 <sup>f</sup>           | 0.30 <sup>de</sup>             | 0.36 <sup>b</sup>            | 0.39 <sup>a</sup>             | 0.37 <sup>b</sup>             | 0.029 | <0.001               |
| C10:0              | 27.8 <sup>c</sup>            | 27.4 <sup>cd</sup>            | 26.9 <sup>de</sup>         | 27.4 <sup>c</sup>          | 27.0 <sup>cd</sup>       | 25.7 <sup>e</sup>         | 25.9 <sup>e</sup>         | 26.0 <sup>e</sup>           | 26.7 <sup>cd</sup>             | 28.9 <sup>b</sup>            | 29.6 <sup>a</sup>             | 29.5 <sup>ab</sup>            | 2.49  | <0.001               |
| C10:1 <i>c</i> 9   | 2.77 <sup>cd</sup>           | 2.70 <sup>cd</sup>            | 2.55 <sup>e</sup>          | 2.49 <sup>e</sup>          | 2.47 <sup>e</sup>        | 2.44 <sup>e</sup>         | 2.64 <sup>d</sup>         | 2.73 <sup>c</sup>           | 2.79 <sup>c</sup>              | 3.04 <sup>ab</sup>           | 3.06 <sup>a</sup>             | 2.99 <sup>b</sup>             | 0.243 | <0.001               |
| C11:0              | 0.56 <sup>defg</sup>         | 0.60 <sup>def</sup>           | 0.53 <sup>g</sup>          | 0.58 <sup>df</sup>         | 0.54 <sup>efg</sup>      | 0.42 <sup>hi</sup>        | 0.42 <sup>i</sup>         | 0.45 <sup>h</sup>           | 0.54 <sup>fg</sup>             | 0.68 <sup>c</sup>            | 0.77 <sup>a</sup>             | 0.74 <sup>b</sup>             | 0.054 | <0.001               |
| C11:1 <i>c</i> 10  | 0.02 <sup>fg</sup>           | 0.02 <sup>ef</sup>            | 0.01 <sup>gh</sup>         | 0.02 <sup>f</sup>          | 0.02 <sup>de</sup>       | 0.01 <sup>h</sup>         | 0.02 <sup>fg</sup>        | 0.02 <sup>ef</sup>          | 0.02 <sup>d</sup>              | 0.03 <sup>b</sup>            | 0.03 <sup>a</sup>             | 0.02 <sup>c</sup>             | 0.001 | <0.001               |
| C12:0              | 35.0 <sup>c</sup>            | 34.5 <sup>c</sup>             | 33.6 <sup>def</sup>        | 34.0 <sup>c</sup>          | 33.2 <sup>cde</sup>      | 31.7 <sup>g</sup>         | 32.2 <sup>fg</sup>        | 32.6 <sup>efg</sup>         | 33.6 <sup>cd</sup>             | 36.3 <sup>b</sup>            | 37.2 <sup>a</sup>             | 36.8 <sup>ab</sup>            | 3.16  | <0.001               |
| C13:0 iso          | 0.19 <sup>h</sup>            | 0.24 <sup>fg</sup>            | 0.23 <sup>g</sup>          | 0.27 <sup>de</sup>         | 0.28 <sup>bc</sup>       | 0.27 <sup>cd</sup>        | 0.31 <sup>a</sup>         | 0.29 <sup>b</sup>           | 0.28 <sup>bcd</sup>            | 0.25 <sup>ef</sup>           | 0.24 <sup>g</sup>             | 0.25 <sup>f</sup>             | 0.031 | <0.001               |
| C13:0 anteiso      | 0.08 <sup>d</sup>            | 0.11 <sup>bc</sup>            | 0.10 <sup>bc</sup>         | 0.10 <sup>c</sup>          | 0.12 <sup>a</sup>        | 0.11 <sup>ab</sup>        | 0.11 <sup>ab</sup>        | 0.11 <sup>abc</sup>         | 0.07 <sup>e</sup>              | 0.08 <sup>d</sup>            | 0.11 <sup>ab</sup>            | 0.11 <sup>abc</sup>           | 0.012 | <0.001               |
| C12:1 <i>c</i> 9   | 0.84 <sup>def</sup>          | 0.86 <sup>cde</sup>           | 0.79 <sup>g</sup>          | 0.81 <sup>de</sup>         | 0.82 <sup>de</sup>       | 0.78 <sup>fg</sup>        | 0.81 <sup>efg</sup>       | 0.85 <sup>cd</sup>          | 0.88 <sup>c</sup>              | 0.99 <sup>ab</sup>           | 1.02 <sup>a</sup>             | 0.97 <sup>b</sup>             | 0.082 | <0.001               |
| C13:0              | 1.00 <sup>de</sup>           | 1.00 <sup>d</sup>             | 0.91 <sup>gh</sup>         | 0.93 <sup>ef</sup>         | 0.91 <sup>fg</sup>       | 0.79 <sup>i</sup>         | 0.83 <sup>i</sup>         | 0.84 <sup>hi</sup>          | 0.91 <sup>fg</sup>             | 1.07 <sup>c</sup>            | 1.19 <sup>a</sup>             | 1.14 <sup>b</sup>             | 0.088 | <0.001               |
| <i>c</i> 14:0 iso  | 0.91 <sup>bcd</sup>          | 0.93 <sup>ab</sup>            | 0.91 <sup>bcd</sup>        | 0.84 <sup>f</sup>          | 0.85 <sup>ef</sup>       | 0.89 <sup>cd</sup>        | 0.96 <sup>a</sup>         | 0.91 <sup>bc</sup>          | 0.89 <sup>de</sup>             | 0.82 <sup>f</sup>            | 0.82 <sup>f</sup>             | 0.84 <sup>f</sup>             | 0.100 | <0.001               |
| C13:1              | 0.05 <sup>f</sup>            | 0.06 <sup>cd</sup>            | 0.04 <sup>h</sup>          | 0.04 <sup>h</sup>          | 0.05 <sup>def</sup>      | 0.04 <sup>g</sup>         | 0.05 <sup>ef</sup>        | 0.05 <sup>cdf</sup>         | 0.06 <sup>c</sup>              | 0.06 <sup>b</sup>            | 0.07 <sup>a</sup>             | 0.07 <sup>b</sup>             | 0.005 | <0.001               |
| C14:0              | 112 <sup>cd</sup>            | 110 <sup>d</sup>              | 107 <sup>e</sup>           | 105 <sup>g</sup>           | 106 <sup>efg</sup>       | 104 <sup>fg</sup>         | 106 <sup>eg</sup>         | 106 <sup>efg</sup>          | 107 <sup>e</sup>               | 113 <sup>bc</sup>            | 115 <sup>a</sup>              | 114 <sup>ab</sup>             | 9.7   | <0.001               |
| C14:1 <i>t</i> 9   | 2.17 <sup>efg</sup>          | 2.22 <sup>de</sup>            | 2.17 <sup>fg</sup>         | 2.24 <sup>e</sup>          | 2.28 <sup>cd</sup>       | 2.34 <sup>b</sup>         | 2.50 <sup>a</sup>         | 2.34 <sup>bc</sup>          | 2.24 <sup>def</sup>            | 2.11 <sup>g</sup>            | 2.07 <sup>h</sup>             | 2.09 <sup>gh</sup>            | 0.249 | <0.001               |
| C15:0              | 4.32 <sup>de</sup>           | 4.30 <sup>de</sup>            | 4.10 <sup>g</sup>          | 4.56 <sup>c</sup>          | 4.91 <sup>a</sup>        | 4.78 <sup>b</sup>         | 4.88 <sup>ab</sup>        | 4.55 <sup>c</sup>           | 4.35 <sup>d</sup>              | 4.18 <sup>eg</sup>           | 4.11 <sup>g</sup>             | 4.08 <sup>g</sup>             | 0.472 | <0.001               |
| C15:1 <i>c</i> 9   | 9.76 <sup>cd</sup>           | 9.36 <sup>e</sup>             | 8.72 <sup>f</sup>          | 8.46 <sup>g</sup>          | 8.72 <sup>f</sup>        | 8.79 <sup>f</sup>         | 9.32 <sup>de</sup>        | 9.76 <sup>c</sup>           | 9.74 <sup>c</sup>              | 10.6 <sup>a</sup>            | 10.7 <sup>a</sup>             | 10.2 <sup>b</sup>             | 0.852 | <0.001               |
| C15:0 anteiso      | 11.7 <sup>ab</sup>           | 11.2 <sup>c</sup>             | 10.5 <sup>f</sup>          | 9.99 <sup>g</sup>          | 10.3 <sup>f</sup>        | 10.0 <sup>g</sup>         | 10.5 <sup>def</sup>       | 10.4 <sup>ef</sup>          | 10.7 <sup>df</sup>             | 11.5 <sup>bc</sup>           | 12.1 <sup>a</sup>             | 11.7 <sup>ab</sup>            | 1.012 | <0.001               |
| C16:0 iso          | 2.13 <sup>bc</sup>           | 2.18 <sup>a</sup>             | 2.20 <sup>a</sup>          | 2.01 <sup>e</sup>          | 2.10 <sup>cd</sup>       | 2.16 <sup>ab</sup>        | 2.17 <sup>ab</sup>        | 2.02 <sup>de</sup>          | 1.90 <sup>hf</sup>             | 1.86 <sup>gh</sup>           | 1.86 <sup>h</sup>             | 1.90 <sup>fgh</sup>           | 0.222 | <0.001               |
| C16:0              | 321 <sup>c</sup>             | 315 <sup>d</sup>              | 306 <sup>ef</sup>          | 287 <sup>i</sup>           | 295 <sup>h</sup>         | 300 <sup>g</sup>          | 306 <sup>f</sup>          | 314 <sup>de</sup>           | 313 <sup>de</sup>              | 330 <sup>ab</sup>            | 334 <sup>a</sup>              | 327 <sup>d</sup>              | 27.9  | <0.001               |
| C16:1 <i>t</i> 6-8 | 0.29 <sup>bc</sup>           | 0.32 <sup>a</sup>             | 0.33 <sup>a</sup>          | 0.32 <sup>a</sup>          | 0.23 <sup>e</sup>        | 0.27 <sup>d</sup>         | 0.28 <sup>bc</sup>        | 0.29 <sup>bc</sup>          | 0.30 <sup>b</sup>              | 0.28 <sup>cd</sup>           | 0.33 <sup>a</sup>             | 0.28 <sup>bcd</sup>           | 0.027 | <0.001               |
| C16:1 <i>t</i> 9   | 0.08 <sup>c</sup>            | 0.11 <sup>a</sup>             | 0.09 <sup>bc</sup>         | 0.08 <sup>c</sup>          | 0.06 <sup>f</sup>        | 0.05 <sup>g</sup>         | 0.08 <sup>c</sup>         | 0.07 <sup>ef</sup>          | 0.08 <sup>cde</sup>            | 0.07 <sup>def</sup>          | 0.08 <sup>ce</sup>            | 0.10 <sup>ab</sup>            | 0.009 | <0.001               |
| C17:0 iso          | 3.30 <sup>e</sup>            | 3.37 <sup>e</sup>             | 3.35 <sup>e</sup>          | 4.12 <sup>b</sup>          | 4.36 <sup>a</sup>        | 4.31 <sup>a</sup>         | 4.13 <sup>b</sup>         | 3.90 <sup>c</sup>           | 3.73 <sup>c</sup>              | 3.27 <sup>d</sup>            | 3.22 <sup>e</sup>             | 3.22 <sup>e</sup>             | 0.421 | <0.001               |

|                                      |                       |                       |                       |                     |                     |                      |                      |                       |                     |                     |                      |                      |       |        |
|--------------------------------------|-----------------------|-----------------------|-----------------------|---------------------|---------------------|----------------------|----------------------|-----------------------|---------------------|---------------------|----------------------|----------------------|-------|--------|
| C16:1 <i>t</i> 11/13                 | 1.55 <sup>i</sup>     | 1.81 <sup>g</sup>     | 1.88 <sup>f</sup>     | 2.28 <sup>b</sup>   | 2.35 <sup>a</sup>   | 2.27 <sup>b</sup>    | 2.20 <sup>c</sup>    | 2.08 <sup>c</sup>     | 1.98 <sup>e</sup>   | 1.75 <sup>e</sup>   | 1.68 <sup>g</sup>    | 1.68 <sup>h</sup>    | 0.215 | <0.001 |
| C16:1 + C17:0 anteiso                | 17.8 <sup>de</sup>    | 17.6 <sup>de</sup>    | 17.4 <sup>e</sup>     | 17.7 <sup>d</sup>   | 18.3 <sup>bc</sup>  | 18.5 <sup>abc</sup>  | 18.3 <sup>bc</sup>   | 18.8 <sup>a</sup>     | 18.6 <sup>ab</sup>  | 18.7 <sup>a</sup>   | 18.6 <sup>ab</sup>   | 17.8 <sup>cd</sup>   | 1.75  | <0.001 |
| C16:1 <i>c</i> 11                    | 0.90 <sup>h</sup>     | 1.04 <sup>abcde</sup> | 1.05 <sup>cde</sup>   | 1.06 <sup>de</sup>  | 0.93 <sup>gh</sup>  | 0.96 <sup>fgh</sup>  | 1.07 <sup>bcde</sup> | 1.14 <sup>bcd</sup>   | 1.16 <sup>ac</sup>  | 1.02 <sup>efh</sup> | 1.00 <sup>efgh</sup> | 0.96 <sup>efgh</sup> | 0.124 | <0.001 |
| C16:1 <i>c</i> 13                    | 1.29 <sup>c</sup>     | 1.19 <sup>de</sup>    | 1.06 <sup>gh</sup>    | 1.07 <sup>fgh</sup> | 1.33 <sup>abc</sup> | 1.15 <sup>ef</sup>   | 1.02 <sup>h</sup>    | 1.09 <sup>efg</sup>   | 1.12 <sup>efg</sup> | 1.35 <sup>ac</sup>  | 1.40 <sup>a</sup>    | 1.25 <sup>bcd</sup>  | 0.126 | <0.001 |
| C17:0                                | 5.32 <sup>bc</sup>    | 5.40 <sup>bc</sup>    | 5.38 <sup>bc</sup>    | 5.31 <sup>bc</sup>  | 4.88 <sup>d</sup>   | 5.27 <sup>bc</sup>   | 5.57 <sup>a</sup>    | 5.40 <sup>b</sup>     | 5.34 <sup>bc</sup>  | 5.26 <sup>c</sup>   | 5.32 <sup>bc</sup>   | 5.32 <sup>bc</sup>   | 0.521 | <0.001 |
| C17:1 <i>t</i> 10                    | 0.48 <sup>d</sup>     | 0.52 <sup>cb</sup>    | 0.57 <sup>a</sup>     | 0.58 <sup>a</sup>   | 0.44 <sup>e</sup>   | 0.49 <sup>cd</sup>   | 0.57 <sup>a</sup>    | 0.53 <sup>b</sup>     | 0.57 <sup>a</sup>   | 0.53 <sup>b</sup>   | 0.51 <sup>cd</sup>   | 0.52 <sup>bc</sup>   | 0.049 | <0.001 |
| C18:0 iso                            | 0.47 <sup>bc</sup>    | 0.31 <sup>g</sup>     | 0.44 <sup>ef</sup>    | 0.46 <sup>cb</sup>  | 0.41 <sup>f</sup>   | 0.42 <sup>ef</sup>   | 0.55 <sup>a</sup>    | 0.45 <sup>ef</sup>    | 0.50 <sup>b</sup>   | 0.46 <sup>ce</sup>  | 0.49 <sup>b</sup>    | 0.49 <sup>b</sup>    | 0.052 | <0.001 |
| C17:0 <i>c</i> 9                     | 2.02 <sup>efg</sup>   | 2.02 <sup>fg</sup>    | 2.01 <sup>fg</sup>    | 2.11 <sup>cde</sup> | 2.10 <sup>deg</sup> | 2.25 <sup>a</sup>    | 2.21 <sup>ab</sup>   | 2.19 <sup>abc</sup>   | 2.15 <sup>bcd</sup> | 1.99 <sup>g</sup>   | 2.06 <sup>ef</sup>   | 2.01 <sup>efg</sup>  | 0.223 | <0.001 |
| C18:0                                | 98.5 <sup>e</sup>     | 101 <sup>cd</sup>     | 106 <sup>ab</sup>     | 106 <sup>ab</sup>   | 105 <sup>ab</sup>   | 107 <sup>a</sup>     | 103 <sup>bc</sup>    | 99.9 <sup>de</sup>    | 99.1 <sup>de</sup>  | 92.8 <sup>fg</sup>  | 91.4 <sup>g</sup>    | 95.2 <sup>f</sup>    | 10.05 | <0.001 |
| C18:1 <i>t</i> 4                     | 0.15 <sup>cd</sup>    | 0.19 <sup>a</sup>     | 0.18 <sup>b</sup>     | 0.17 <sup>b</sup>   | 0.13 <sup>e</sup>   | 0.14 <sup>de</sup>   | 0.18 <sup>ab</sup>   | 0.17 <sup>bc</sup>    | 0.18 <sup>ab</sup>  | 0.18 <sup>bc</sup>  | 0.18 <sup>ab</sup>   | 0.18 <sup>ab</sup>   | 0.019 | <0.001 |
| C18:1 <i>t</i> 5                     | 0.14 <sup>f</sup>     | 0.16 <sup>cb</sup>    | 0.17 <sup>b</sup>     | 0.18 <sup>a</sup>   | 0.11 <sup>g</sup>   | 0.11 <sup>g</sup>    | 0.16 <sup>cdf</sup>  | 0.15 <sup>ef</sup>    | 0.15 <sup>def</sup> | 0.15 <sup>f</sup>   | 0.15 <sup>f</sup>    | 0.15 <sup>f</sup>    | 0.015 | <0.001 |
| C18:1 <i>t</i> 6-8                   | 2.91 <sup>efghi</sup> | 3.10 <sup>cdf</sup>   | 3.26 <sup>ab</sup>    | 3.30 <sup>a</sup>   | 3.18 <sup>bc</sup>  | 2.92 <sup>fghi</sup> | 2.99 <sup>defg</sup> | 2.88 <sup>ghi</sup>   | 2.93 <sup>fgh</sup> | 2.75 <sup>i</sup>   | 2.76 <sup>hi</sup>   | 2.82 <sup>hi</sup>   | 0.340 | <0.001 |
| C18:1 <i>t</i> 9                     | 2.35 <sup>abc</sup>   | 2.33 <sup>bc</sup>    | 2.32 <sup>bc</sup>    | 2.38 <sup>ab</sup>  | 2.48 <sup>a</sup>   | 2.30 <sup>bc</sup>   | 2.11 <sup>ef</sup>   | 2.20 <sup>cdef</sup>  | 2.21 <sup>cde</sup> | 2.10 <sup>f</sup>   | 2.14 <sup>def</sup>  | 2.25 <sup>ce</sup>   | 0.265 | <0.001 |
| C18:1 <i>t</i> 10                    | 4.59 <sup>cd</sup>    | 5.25 <sup>ab</sup>    | 5.61 <sup>ab</sup>    | 5.68 <sup>ab</sup>  | 5.71 <sup>a</sup>   | 5.50 <sup>a</sup>    | 5.14 <sup>bc</sup>   | 5.36 <sup>ab</sup>    | 5.55 <sup>ab</sup>  | 4.39 <sup>d</sup>   | 3.72 <sup>e</sup>    | 4.20 <sup>de</sup>   | 0.718 | <0.001 |
| C18:1 <i>t</i> 11                    | 11.2 <sup>def</sup>   | 11.4 <sup>def</sup>   | 12.2 <sup>de</sup>    | 19.3 <sup>a</sup>   | 19.0 <sup>a</sup>   | 16.1 <sup>b</sup>    | 15.4 <sup>b</sup>    | 13.7 <sup>c</sup>     | 13.5 <sup>c</sup>   | 11.8 <sup>d</sup>   | 11.0 <sup>d</sup>    | 10.6 <sup>f</sup>    | 1.88  | <0.001 |
| C18:1 <i>c</i> 6/ <i>t</i> 12        | 4.42 <sup>c</sup>     | 4.70 <sup>b</sup>     | 5.16 <sup>a</sup>     | 4.84 <sup>b</sup>   | 4.40 <sup>c</sup>   | 4.11 <sup>df</sup>   | 3.95 <sup>ef</sup>   | 3.89 <sup>ef</sup>    | 4.27 <sup>cd</sup>  | 3.92 <sup>f</sup>   | 3.91 <sup>f</sup>    | 4.12 <sup>de</sup>   | 0.465 | <0.001 |
| C18:1 <i>c</i> 9                     | 189 <sup>h</sup>      | 191 <sup>gh</sup>     | 197 <sup>def</sup>    | 204 <sup>ab</sup>   | 202 <sup>cb</sup>   | 206 <sup>a</sup>     | 198 <sup>cdef</sup>  | 198 <sup>ef</sup>     | 196 <sup>fg</sup>   | 181 <sup>i</sup>    | 177 <sup>j</sup>     | 179 <sup>ij</sup>    | 19.0  | <0.001 |
| C18:1 <i>t</i> 15                    | 2.75 <sup>g</sup>     | 2.99 <sup>f</sup>     | 3.96 <sup>ab</sup>    | 4.11 <sup>a</sup>   | 3.30 <sup>de</sup>  | 3.28 <sup>d</sup>    | 3.72 <sup>bc</sup>   | 3.27 <sup>de</sup>    | 3.21 <sup>def</sup> | 3.26 <sup>def</sup> | 3.10 <sup>ef</sup>   | 3.74 <sup>c</sup>    | 0.356 | <0.001 |
| C18:1 <i>c</i> 11                    | 5.69 <sup>fg</sup>    | 5.97 <sup>cde</sup>   | 6.50 <sup>a</sup>     | 6.57 <sup>a</sup>   | 5.89 <sup>bcd</sup> | 6.08 <sup>c</sup>    | 6.13 <sup>bc</sup>   | 5.67 <sup>efg</sup>   | 5.90 <sup>cdf</sup> | 5.49 <sup>g</sup>   | 5.24 <sup>h</sup>    | 5.72 <sup>defg</sup> | 0.699 | <0.001 |
| C18:1 <i>c</i> 12                    | 2.58 <sup>bc</sup>    | 2.63 <sup>b</sup>     | 2.75 <sup>a</sup>     | 2.32 <sup>deg</sup> | 2.17 <sup>fg</sup>  | 2.18 <sup>fg</sup>   | 2.00 <sup>h</sup>    | 1.99 <sup>h</sup>     | 2.17 <sup>g</sup>   | 2.20 <sup>efg</sup> | 2.36 <sup>cd</sup>   | 2.42 <sup>cd</sup>   | 0.283 | <0.001 |
| C18:1 <i>c</i> 13                    | 0.56 <sup>e</sup>     | 0.71 <sup>c</sup>     | 0.76 <sup>b</sup>     | 0.84 <sup>a</sup>   | 0.58 <sup>e</sup>   | 0.51 <sup>fg</sup>   | 0.70 <sup>c</sup>    | 0.77 <sup>b</sup>     | 0.82 <sup>a</sup>   | 0.66 <sup>d</sup>   | 0.49 <sup>g</sup>    | 0.55 <sup>ef</sup>   | 0.059 | <0.001 |
| C18:1 <i>t</i> 6 + C18:1 <i>c</i> 14 | 3.34 <sup>defg</sup>  | 3.30 <sup>efgh</sup>  | 3.56 <sup>c</sup>     | 3.93 <sup>a</sup>   | 3.71 <sup>b</sup>   | 3.55 <sup>c</sup>    | 3.51 <sup>cd</sup>   | 3.44 <sup>cde</sup>   | 3.40 <sup>def</sup> | 3.21 <sup>h</sup>   | 3.22 <sup>gh</sup>   | 3.27 <sup>fgh</sup>  | 0.354 | <0.001 |
| C19:0 + C18:1 <i>c</i> 15            | 1.41 <sup>def</sup>   | 1.44 <sup>efg</sup>   | 1.48 <sup>ef</sup>    | 1.58 <sup>c</sup>   | 1.67 <sup>b</sup>   | 1.75 <sup>a</sup>    | 1.69 <sup>ab</sup>   | 1.58 <sup>cd</sup>    | 1.46 <sup>efg</sup> | 1.39 <sup>g</sup>   | 1.43 <sup>fg</sup>   | 1.49 <sup>cde</sup>  | 0.174 | <0.001 |
| C18:2 <i>t</i> 11/ <i>t</i> 15       | 0.18 <sup>f</sup>     | 0.20 <sup>f</sup>     | 0.22 <sup>ef</sup>    | 0.45 <sup>a</sup>   | 0.41 <sup>b</sup>   | 0.33 <sup>c</sup>    | 0.29 <sup>d</sup>    | 0.29 <sup>d</sup>     | 0.25 <sup>e</sup>   | 0.20 <sup>f</sup>   | 0.18 <sup>f</sup>    | 0.18 <sup>f</sup>    | 0.045 | <0.001 |
| C18:2 <i>t</i> 9/ <i>t</i> 12        | 0.04 <sup>fgh</sup>   | 0.04 <sup>fgh</sup>   | 0.04 <sup>cdefg</sup> | 0.05 <sup>b</sup>   | 0.06 <sup>b</sup>   | 0.04 <sup>bcd</sup>  | 0.05 <sup>bcd</sup>  | 0.04 <sup>defg</sup>  | 0.04 <sup>bcd</sup> | 0.04 <sup>efg</sup> | 0.03 <sup>h</sup>    | 0.03 <sup>gh</sup>   | 0.006 | <0.001 |
| C18:2 <i>c</i> 8/ <i>c</i> 13        | 2.01 <sup>efg</sup>   | 2.12 <sup>cde</sup>   | 2.19 <sup>bcd</sup>   | 2.58 <sup>a</sup>   | 2.59 <sup>a</sup>   | 2.30 <sup>b</sup>    | 2.06 <sup>def</sup>  | 2.21 <sup>bc</sup>    | 2.23 <sup>bc</sup>  | 2.01 <sup>efg</sup> | 1.98 <sup>fg</sup>   | 1.89 <sup>g</sup>    | 0.249 | <0.001 |
| C18:2 <i>c</i> 10/ <i>t</i> 14       | 1.15 <sup>bcd</sup>   | 1.24 <sup>a</sup>     | 1.15 <sup>cdf</sup>   | 1.08 <sup>ef</sup>  | 1.13 <sup>cd</sup>  | 1.09 <sup>def</sup>  | 1.09 <sup>def</sup>  | 1.06 <sup>f</sup>     | 0.86 <sup>g</sup>   | 1.10 <sup>def</sup> | 1.24 <sup>ab</sup>   | 1.23 <sup>abc</sup>  | 0.121 | <0.001 |
| C18:2 <i>c</i> 9/ <i>c</i> 14        | 1.22 <sup>defg</sup>  | 1.26 <sup>bcde</sup>  | 1.28 <sup>bc</sup>    | 1.39 <sup>a</sup>   | 1.36 <sup>a</sup>   | 1.30 <sup>b</sup>    | 1.24 <sup>cdef</sup> | 1.30 <sup>b</sup>     | 1.29 <sup>bcd</sup> | 1.21 <sup>efg</sup> | 1.20 <sup>gf</sup>   | 1.18 <sup>g</sup>    | 0.137 | <0.001 |
| C18:2 <i>c</i> 9/ <i>t</i> 12        | 0.63 <sup>cd</sup>    | 0.63 <sup>cde</sup>   | 0.66 <sup>b</sup>     | 0.70 <sup>a</sup>   | 0.66 <sup>b</sup>   | 0.63 <sup>d</sup>    | 0.60 <sup>efg</sup>  | 0.60 <sup>cdefg</sup> | 0.60 <sup>def</sup> | 0.58 <sup>g</sup>   | 0.59 <sup>fg</sup>   | 0.60 <sup>defg</sup> | 0.067 | <0.001 |
| C18:1 <i>c</i> 16                    | 0.28 <sup>cd</sup>    | 0.27 <sup>de</sup>    | 0.29 <sup>cd</sup>    | 0.39 <sup>b</sup>   | 0.47 <sup>a</sup>   | 0.39 <sup>b</sup>    | 0.29 <sup>c</sup>    | 0.27 <sup>cd</sup>    | 0.29 <sup>cd</sup>  | 0.25 <sup>e</sup>   | 0.20 <sup>f</sup>    | 0.25 <sup>e</sup>    | 0.042 | <0.001 |
| C18:1 <i>t</i> 11/ <i>c</i> 15       | 1.25 <sup>ef</sup>    | 1.24 <sup>ef</sup>    | 1.31 <sup>ef</sup>    | 2.46 <sup>a</sup>   | 2.22 <sup>b</sup>   | 1.87 <sup>cd</sup>   | 1.99 <sup>c</sup>    | 1.87 <sup>cd</sup>    | 1.80 <sup>d</sup>   | 1.41 <sup>e</sup>   | 1.18 <sup>f</sup>    | 1.09 <sup>f</sup>    | 0.245 | <0.001 |
| C18:2 <i>t</i> 9/ <i>c</i> 12        | 0.20 <sup>a</sup>     | 0.19 <sup>b</sup>     | 0.18 <sup>b</sup>     | 0.09 <sup>efg</sup> | 0.06 <sup>h</sup>   | 0.09 <sup>ef</sup>   | 0.07 <sup>gh</sup>   | 0.07 <sup>fgh</sup>   | 0.09 <sup>e</sup>   | 0.14 <sup>dc</sup>  | 0.12 <sup>d</sup>    | 0.14 <sup>c</sup>    | 0.016 | <0.001 |
| C18:2 <i>c</i> 9/ <i>c</i> 12        | 18.4 <sup>cdef</sup>  | 18.8 <sup>be</sup>    | 19.2 <sup>a</sup>     | 18.4 <sup>bce</sup> | 17.8 <sup>def</sup> | 17.8 <sup>def</sup>  | 17.0 <sup>h</sup>    | 17.0 <sup>gh</sup>    | 17.5 <sup>th</sup>  | 17.5 <sup>fgh</sup> | 17.7 <sup>efh</sup>  | 17.9 <sup>efgh</sup> | 1.986 | <0.001 |



|                                                                                                     |                      |                      |                      |                      |                     |                       |                     |                      |                      |                      |                      |                      |       |        |
|-----------------------------------------------------------------------------------------------------|----------------------|----------------------|----------------------|----------------------|---------------------|-----------------------|---------------------|----------------------|----------------------|----------------------|----------------------|----------------------|-------|--------|
| C18:2 <i>t</i> 12 <i>c</i> 15                                                                       | 0.99 <sup>b</sup>    | 0.78 <sup>efg</sup>  | 1.15 <sup>a</sup>    | 0.93 <sup>cd</sup>   | 0.87 <sup>de</sup>  | 0.99 <sup>cb</sup>    | 1.14 <sup>a</sup>   | 0.97 <sup>bc</sup>   | 0.74 <sup>g</sup>    | 0.78 <sup>g</sup>    | 0.78 <sup>fg</sup>   | 0.84 <sup>def</sup>  | 0.107 | <0.001 |
| C19:1                                                                                               | 0.18 <sup>cd</sup>   | 0.23 <sup>b</sup>    | 0.26 <sup>a</sup>    | 0.25 <sup>a</sup>    | 0.21 <sup>b</sup>   | 0.21 <sup>b</sup>     | 0.19 <sup>c</sup>   | 0.17 <sup>d</sup>    | 0.13 <sup>ef</sup>   | 0.15 <sup>e</sup>    | 0.13 <sup>f</sup>    | 0.16 <sup>d</sup>    | 0.024 | <0.001 |
| C20:0                                                                                               | 1.75 <sup>a</sup>    | 1.76 <sup>a</sup>    | 1.68 <sup>b</sup>    | 1.54 <sup>e</sup>    | 1.45 <sup>f</sup>   | 1.62 <sup>dc</sup>    | 1.62 <sup>cd</sup>  | 1.57 <sup>e</sup>    | 1.59 <sup>de</sup>   | 1.59 <sup>de</sup>   | 1.68 <sup>bc</sup>   | 1.81 <sup>a</sup>    | 0.168 | <0.001 |
| C18:3 <i>c</i> 6 <i>c</i> 9 <i>c</i> 12                                                             | 0.21 <sup>bc</sup>   | 0.18 <sup>gh</sup>   | 0.19 <sup>ef</sup>   | 0.20 <sup>bcd</sup>  | 0.17 <sup>h</sup>   | 0.19 <sup>cdef</sup>  | 0.21 <sup>b</sup>   | 0.19 <sup>defg</sup> | 0.19 <sup>fg</sup>   | 0.19 <sup>defg</sup> | 0.22 <sup>b</sup>    | 0.24 <sup>a</sup>    | 0.021 | <0.001 |
| C20:1 <i>c</i> 8                                                                                    | 1.19 <sup>bc</sup>   | 1.22 <sup>a</sup>    | 1.22 <sup>ab</sup>   | 1.10 <sup>efg</sup>  | 1.03 <sup>h</sup>   | 1.08 <sup>g</sup>     | 1.13 <sup>def</sup> | 1.09 <sup>g</sup>    | 1.09 <sup>g</sup>    | 1.09 <sup>gf</sup>   | 1.16 <sup>dc</sup>   | 1.13 <sup>cde</sup>  | 0.112 | <0.001 |
| C20:1 <i>c</i> 11                                                                                   | 0.57 <sup>cde</sup>  | 0.65 <sup>ab</sup>   | 0.64 <sup>a</sup>    | 0.59 <sup>bcd</sup>  | 0.66 <sup>abc</sup> | 0.51 <sup>e</sup>     | 0.36 <sup>f</sup>   | 0.38 <sup>f</sup>    | 0.55 <sup>de</sup>   | 0.51 <sup>e</sup>    | 0.49 <sup>e</sup>    | 0.67 <sup>a</sup>    | 0.069 | <0.001 |
| C18:3 <i>c</i> 9 <i>c</i> 12 <i>c</i> 15                                                            | 4.68 <sup>ef</sup>   | 4.92 <sup>df</sup>   | 5.11 <sup>d</sup>    | 6.60 <sup>a</sup>    | 6.08 <sup>b</sup>   | 6.06 <sup>b</sup>     | 6.01 <sup>b</sup>   | 6.01 <sup>b</sup>    | 5.64 <sup>c</sup>    | 4.91 <sup>def</sup>  | 4.86 <sup>def</sup>  | 4.66 <sup>f</sup>    | 0.685 | <0.001 |
| CLA <i>c</i> 9 <i>t</i> 11 + <i>t</i> 7 <i>c</i> 9 + <i>t</i> 8 <i>c</i> 10 + <i>t</i> 6 <i>t</i> 8 | 5.59 <sup>de</sup>   | 5.71 <sup>de</sup>   | 5.80 <sup>de</sup>   | 8.44 <sup>a</sup>    | 8.80 <sup>a</sup>   | 7.76 <sup>b</sup>     | 7.56 <sup>bc</sup>  | 7.27 <sup>c</sup>    | 7.17 <sup>c</sup>    | 5.95 <sup>d</sup>    | 5.44 <sup>e</sup>    | 5.24 <sup>e</sup>    | 0.897 | <0.001 |
| CLA other a                                                                                         | 0.25 <sup>def</sup>  | 0.27 <sup>abc</sup>  | 0.24 <sup>ef</sup>   | 0.21 <sup>g</sup>    | 0.24 <sup>f</sup>   | 0.26 <sup>bc</sup>    | 0.28 <sup>a</sup>   | 0.26 <sup>bcd</sup>  | 0.26 <sup>bcd</sup>  | 0.25 <sup>cde</sup>  | 0.25 <sup>cde</sup>  | 0.26 <sup>cde</sup>  | 0.028 | <0.001 |
| CLA other b                                                                                         | 0.21 <sup>ghi</sup>  | 0.24 <sup>efhi</sup> | 0.23 <sup>fghi</sup> | 0.34 <sup>a</sup>    | 0.28 <sup>bde</sup> | 0.26 <sup>defgh</sup> | 0.29 <sup>be</sup>  | 0.29 <sup>b</sup>    | 0.29 <sup>b</sup>    | 0.25 <sup>defg</sup> | 0.21 <sup>i</sup>    | 0.21 <sup>hi</sup>   | 0.043 | <0.001 |
| CLA other c                                                                                         | 0.15 <sup>de</sup>   | 0.16 <sup>bcd</sup>  | 0.13 <sup>f</sup>    | 0.16 <sup>bcd</sup>  | 0.15 <sup>cd</sup>  | 0.14 <sup>ef</sup>    | 0.18 <sup>a</sup>   | 0.17 <sup>ab</sup>   | 0.17 <sup>abc</sup>  | 0.15 <sup>de</sup>   | 0.16 <sup>bcd</sup>  | 0.15 <sup>d</sup>    | 0.017 | <0.001 |
| CLA other d                                                                                         | 0.34 <sup>ef</sup>   | 0.36 <sup>ef</sup>   | 0.34 <sup>ef</sup>   | 0.49 <sup>b</sup>    | 0.51 <sup>a</sup>   | 0.43 <sup>c</sup>     | 0.43 <sup>c</sup>   | 0.42 <sup>cd</sup>   | 0.40 <sup>d</sup>    | 0.35 <sup>ef</sup>   | 0.36 <sup>e</sup>    | 0.33 <sup>f</sup>    | 0.047 | <0.001 |
| CLA other e                                                                                         | 0.22 <sup>abc</sup>  | 0.22 <sup>abc</sup>  | 0.21 <sup>defg</sup> | 0.22 <sup>a</sup>    | 0.22 <sup>ab</sup>  | 0.22 <sup>ab</sup>    | 0.22 <sup>a</sup>   | 0.21 <sup>cde</sup>  | 0.21 <sup>bcd</sup>  | 0.20 <sup>gf</sup>   | 0.20 <sup>ef</sup>   | 0.20 <sup>g</sup>    | 0.022 | <0.001 |
| CLA other f                                                                                         | 0.05 <sup>b</sup>    | 0.06 <sup>a</sup>    | 0.06 <sup>a</sup>    | 0.04 <sup>def</sup>  | 0.05 <sup>c</sup>   | 0.05 <sup>cde</sup>   | 0.04 <sup>f</sup>   | 0.05 <sup>cde</sup>  | 0.04 <sup>cdef</sup> | 0.04 <sup>cdef</sup> | 0.04 <sup>ef</sup>   | 0.04 <sup>cd</sup>   | 0.006 | <0.001 |
| CLA other g                                                                                         | 0.12 <sup>deg</sup>  | 0.12 <sup>deg</sup>  | 0.11 <sup>fg</sup>   | 0.20 <sup>ab</sup>   | 0.21 <sup>a</sup>   | 0.19 <sup>cb</sup>    | 0.20 <sup>a</sup>   | 0.19 <sup>cb</sup>   | 0.18 <sup>c</sup>    | 0.14 <sup>d</sup>    | 0.11 <sup>efg</sup>  | 0.10 <sup>g</sup>    | 0.025 | <0.001 |
| CLA other h                                                                                         | 0.13 <sup>c</sup>    | 0.12 <sup>c</sup>    | 0.10 <sup>d</sup>    | 0.10 <sup>d</sup>    | 0.13 <sup>c</sup>   | 0.14 <sup>b</sup>     | 0.16 <sup>a</sup>   | 0.13 <sup>c</sup>    | 0.12 <sup>c</sup>    | 0.12 <sup>c</sup>    | 0.16 <sup>a</sup>    | 0.15 <sup>a</sup>    | 0.016 | <0.001 |
| C20:2 <i>c</i> 11 <i>c</i> 14                                                                       | 0.20 <sup>defg</sup> | 0.23 <sup>a</sup>    | 0.21 <sup>bce</sup>  | 0.17 <sup>h</sup>    | 0.18 <sup>h</sup>   | 0.19 <sup>fg</sup>    | 0.20 <sup>cde</sup> | 0.19 <sup>g</sup>    | 0.19 <sup>g</sup>    | 0.20 <sup>cdef</sup> | 0.20 <sup>efg</sup>  | 0.22 <sup>ab</sup>   | 0.021 | <0.001 |
| C22:0                                                                                               | 0.69 <sup>abcd</sup> | 0.71 <sup>b</sup>    | 0.59 <sup>ef</sup>   | 0.55 <sup>g</sup>    | 0.49 <sup>h</sup>   | 0.57 <sup>fg</sup>    | 0.74 <sup>a</sup>   | 0.69 <sup>dc</sup>   | 0.68 <sup>d</sup>    | 0.63 <sup>d</sup>    | 0.69 <sup>bc</sup>   | 0.72 <sup>a</sup>    | 0.071 | <0.001 |
| C20:3 <i>c</i> 8 <i>c</i> 11 <i>c</i> 14                                                            | 0.85 <sup>abcd</sup> | 0.85 <sup>ac</sup>   | 0.83 <sup>bcd</sup>  | 0.80 <sup>ef</sup>   | 0.70 <sup>h</sup>   | 0.77 <sup>g</sup>     | 0.82 <sup>dc</sup>  | 0.79 <sup>efg</sup>  | 0.79 <sup>gf</sup>   | 0.80 <sup>de</sup>   | 0.85 <sup>abc</sup>  | 0.87 <sup>abc</sup>  | 0.083 | <0.001 |
| C22:1 <i>c</i> 13                                                                                   | 0.42 <sup>cd</sup>   | 0.40 <sup>cd</sup>   | 0.60 <sup>a</sup>    | 0.49 <sup>cb</sup>   | 0.18 <sup>e</sup>   | 0.16 <sup>e</sup>     | 0.15 <sup>e</sup>   | 0.13 <sup>e</sup>    | 0.15 <sup>e</sup>    | 0.22 <sup>e</sup>    | 0.32 <sup>d</sup>    | 0.55 <sup>ab</sup>   | 0.067 | <0.001 |
| C20:3 <i>c</i> 11 <i>c</i> 14 <i>c</i> 17                                                           | 0.08 <sup>cd</sup>   | 0.09 <sup>bc</sup>   | 0.07 <sup>d</sup>    | 0.09 <sup>b</sup>    | 0.08 <sup>bcd</sup> | 0.09 <sup>b</sup>     | 0.12 <sup>a</sup>   | 0.10 <sup>b</sup>    | 0.10 <sup>b</sup>    | 0.09 <sup>bc</sup>   | 0.10 <sup>b</sup>    | 0.09 <sup>b</sup>    | 0.014 | <0.001 |
| C20:4 <i>c</i> 5 <i>c</i> 8 <i>c</i> 11 <i>c</i> 14                                                 | 1.07 <sup>cdf</sup>  | 1.08 <sup>abcd</sup> | 1.08 <sup>abcd</sup> | 1.08 <sup>abcd</sup> | 0.97 <sup>h</sup>   | 1.01 <sup>fg</sup>    | 1.05 <sup>d</sup>   | 1.00 <sup>fgh</sup>  | 1.00 <sup>gh</sup>   | 1.05 <sup>bcd</sup>  | 1.10 <sup>ac</sup>   | 1.11 <sup>ac</sup>   | 0.105 | <0.001 |
| C22:2 <i>c</i> 13 <i>c</i> 16                                                                       | 0.34 <sup>fg</sup>   | 0.35 <sup>g</sup>    | 0.30 <sup>h</sup>    | 0.37 <sup>def</sup>  | 0.47 <sup>a</sup>   | 0.42 <sup>b</sup>     | 0.41 <sup>bc</sup>  | 0.41 <sup>b</sup>    | 0.39 <sup>cdf</sup>  | 0.36 <sup>efg</sup>  | 0.36 <sup>efg</sup>  | 0.36 <sup>defg</sup> | 0.049 | <0.001 |
| C20:5 <i>c</i> 5 <i>c</i> 8 <i>c</i> 11 <i>c</i> 14 <i>c</i> 17 (EPA)                               | 0.42 <sup>h</sup>    | 0.47 <sup>g</sup>    | 0.47 <sup>g</sup>    | 0.55 <sup>cd</sup>   | 0.57 <sup>b</sup>   | 0.52 <sup>f</sup>     | 0.60 <sup>a</sup>   | 0.57 <sup>bc</sup>   | 0.58 <sup>b</sup>    | 0.54 <sup>d</sup>    | 0.51 <sup>e</sup>    | 0.49 <sup>fg</sup>   | 0.061 | <0.001 |
| C24:0                                                                                               | 0.37 <sup>i</sup>    | 0.41 <sup>efh</sup>  | 0.42 <sup>bcde</sup> | 0.40 <sup>bcde</sup> | 0.41 <sup>f</sup>   | 0.40 <sup>h</sup>     | 0.45 <sup>a</sup>   | 0.38 <sup>i</sup>    | 0.44 <sup>abc</sup>  | 0.42 <sup>defg</sup> | 0.42 <sup>cdef</sup> | 0.43 <sup>abd</sup>  | 0.046 | <0.001 |
| C24:1 <i>c</i> 15                                                                                   | 0.06 <sup>d</sup>    | 0.05 <sup>e</sup>    | 0.07 <sup>c</sup>    | 0.09 <sup>b</sup>    | 0.07 <sup>c</sup>   | 0.08 <sup>b</sup>     | 0.10 <sup>a</sup>   | 0.08 <sup>b</sup>    | 0.07 <sup>cd</sup>   | 0.06 <sup>cd</sup>   | 0.09 <sup>b</sup>    | 0.10 <sup>a</sup>    | 0.011 | <0.001 |
| C22:3 <i>c</i> 13 <i>c</i> 16 <i>c</i> 19                                                           | 0.11 <sup>a</sup>    | 0.11 <sup>a</sup>    | 0.11 <sup>a</sup>    | 0.09 <sup>bc</sup>   | 0.09 <sup>cd</sup>  | 0.08 <sup>d</sup>     | 0.09 <sup>cd</sup>  | 0.08 <sup>cd</sup>   | 0.08 <sup>cd</sup>   | 0.09 <sup>cd</sup>   | 0.10 <sup>ab</sup>   | 0.10 <sup>a</sup>    | 0.012 | <0.001 |
| C22:4 <i>c</i> 7 <i>c</i> 10 <i>c</i> 13 <i>c</i> 16                                                | 0.07 <sup>bcd</sup>  | 0.06 <sup>ef</sup>   | 0.04 <sup>g</sup>    | 0.03 <sup>h</sup>    | 0.06 <sup>de</sup>  | 0.07 <sup>cb</sup>    | 0.08 <sup>a</sup>   | 0.07 <sup>b</sup>    | 0.06 <sup>cde</sup>  | 0.06 <sup>f</sup>    | 0.07 <sup>b</sup>    | 0.07 <sup>b</sup>    | 0.008 | <0.001 |
| C22:5 <i>c</i> 7 <i>c</i> 10 <i>c</i> 13 <i>c</i> 16 <i>c</i> 19 (DPA)                              | 0.79 <sup>d</sup>    | 0.79 <sup>d</sup>    | 0.76 <sup>e</sup>    | 0.79 <sup>d</sup>    | 0.90 <sup>b</sup>   | 0.91 <sup>b</sup>     | 0.96 <sup>a</sup>   | 0.91 <sup>b</sup>    | 0.92 <sup>b</sup>    | 0.90 <sup>b</sup>    | 0.87 <sup>c</sup>    | 0.84 <sup>c</sup>    | 0.099 | <0.001 |
| C22:6 <i>c</i> 4 <i>c</i> 7 <i>c</i> 10 <i>c</i> 13 <i>c</i> 16 <i>c</i> 19 (DHA)                   | 0.05 <sup>f</sup>    | 0.06 <sup>ef</sup>   | 0.05 <sup>gh</sup>   | 0.04 <sup>h</sup>    | 0.05 <sup>g</sup>   | 0.04 <sup>gh</sup>    | 0.06 <sup>ce</sup>  | 0.06 <sup>ef</sup>   | 0.07 <sup>ab</sup>   | 0.07 <sup>a</sup>    | 0.07 <sup>h</sup>    | 0.07 <sup>ab</sup>   | 0.007 | <0.001 |

---

<sup>1</sup>n is the number of records used to calculate means  $\pm$  SE and P-values. Records with missing values were not included in the analysis

<sup>2</sup>Significances were declared at  $P < 0.05$ . Means for season within a row with different lower-case letters are significantly different according to Fisher's Least Significant Difference test ( $P < 0.05$ ).

---

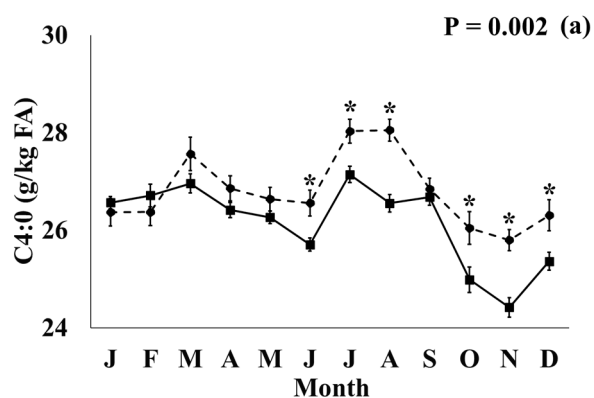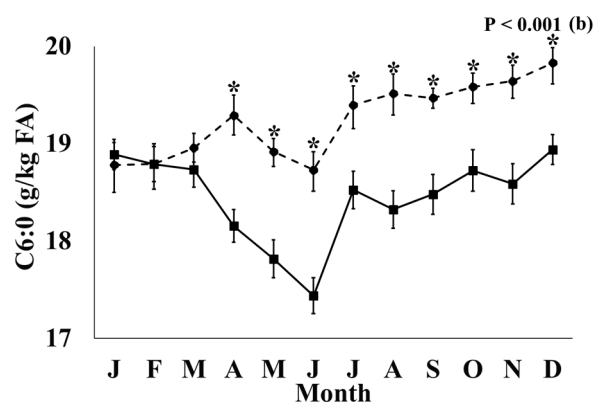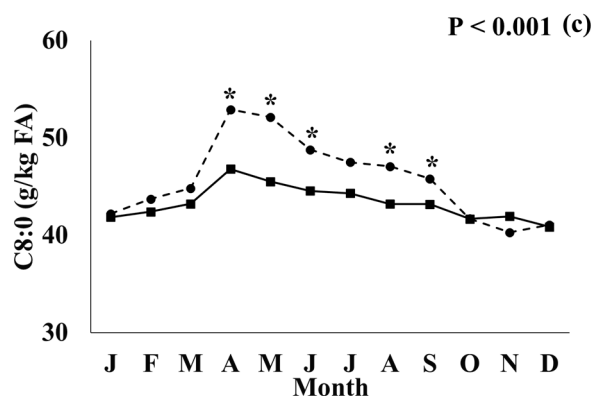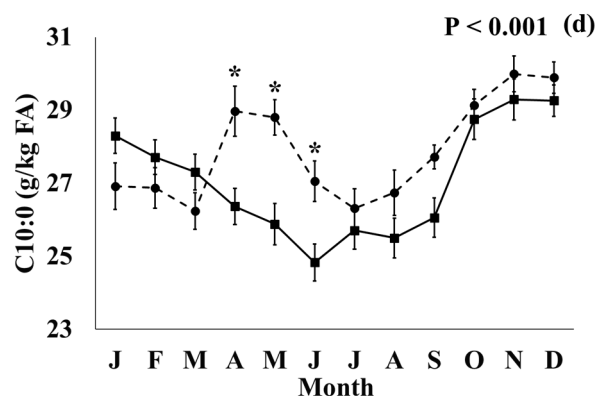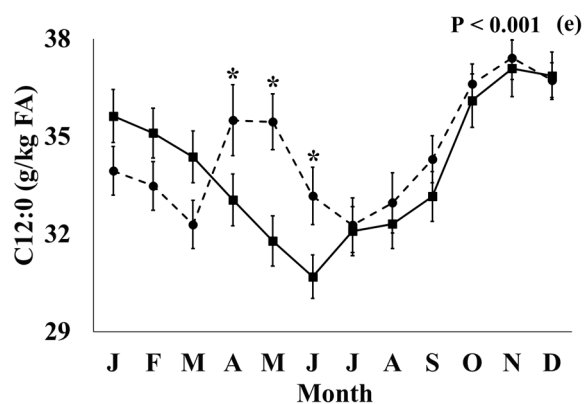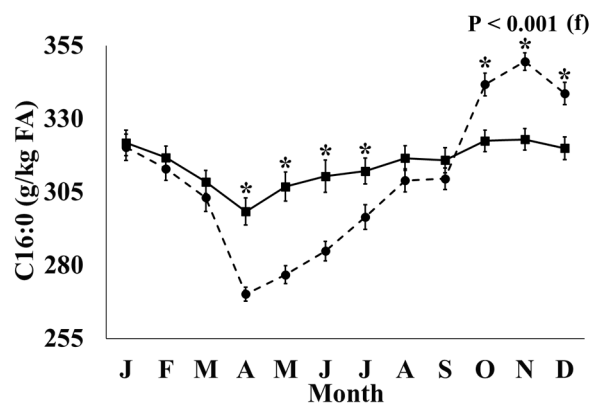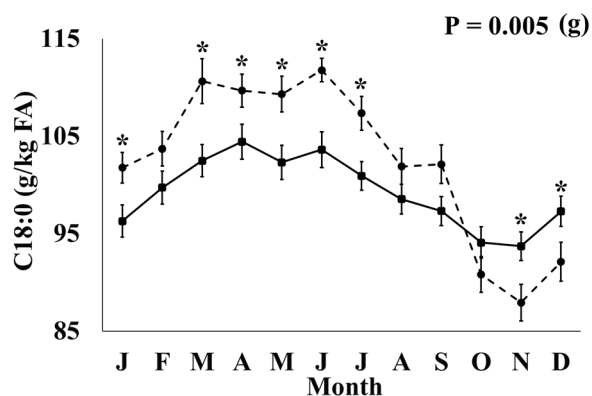

■ Conventional ◆ Organic

**Figure S2:** Individual saturated fatty acids not displayed in main text, where a significant ( $p < 0.05$ ) interaction between production system and month was observed. Means were calculated from the measured values. The error bars represent the standard error of the means. \*: significant difference between conventional and organic farms within the month ( $p < 0.05$ ).

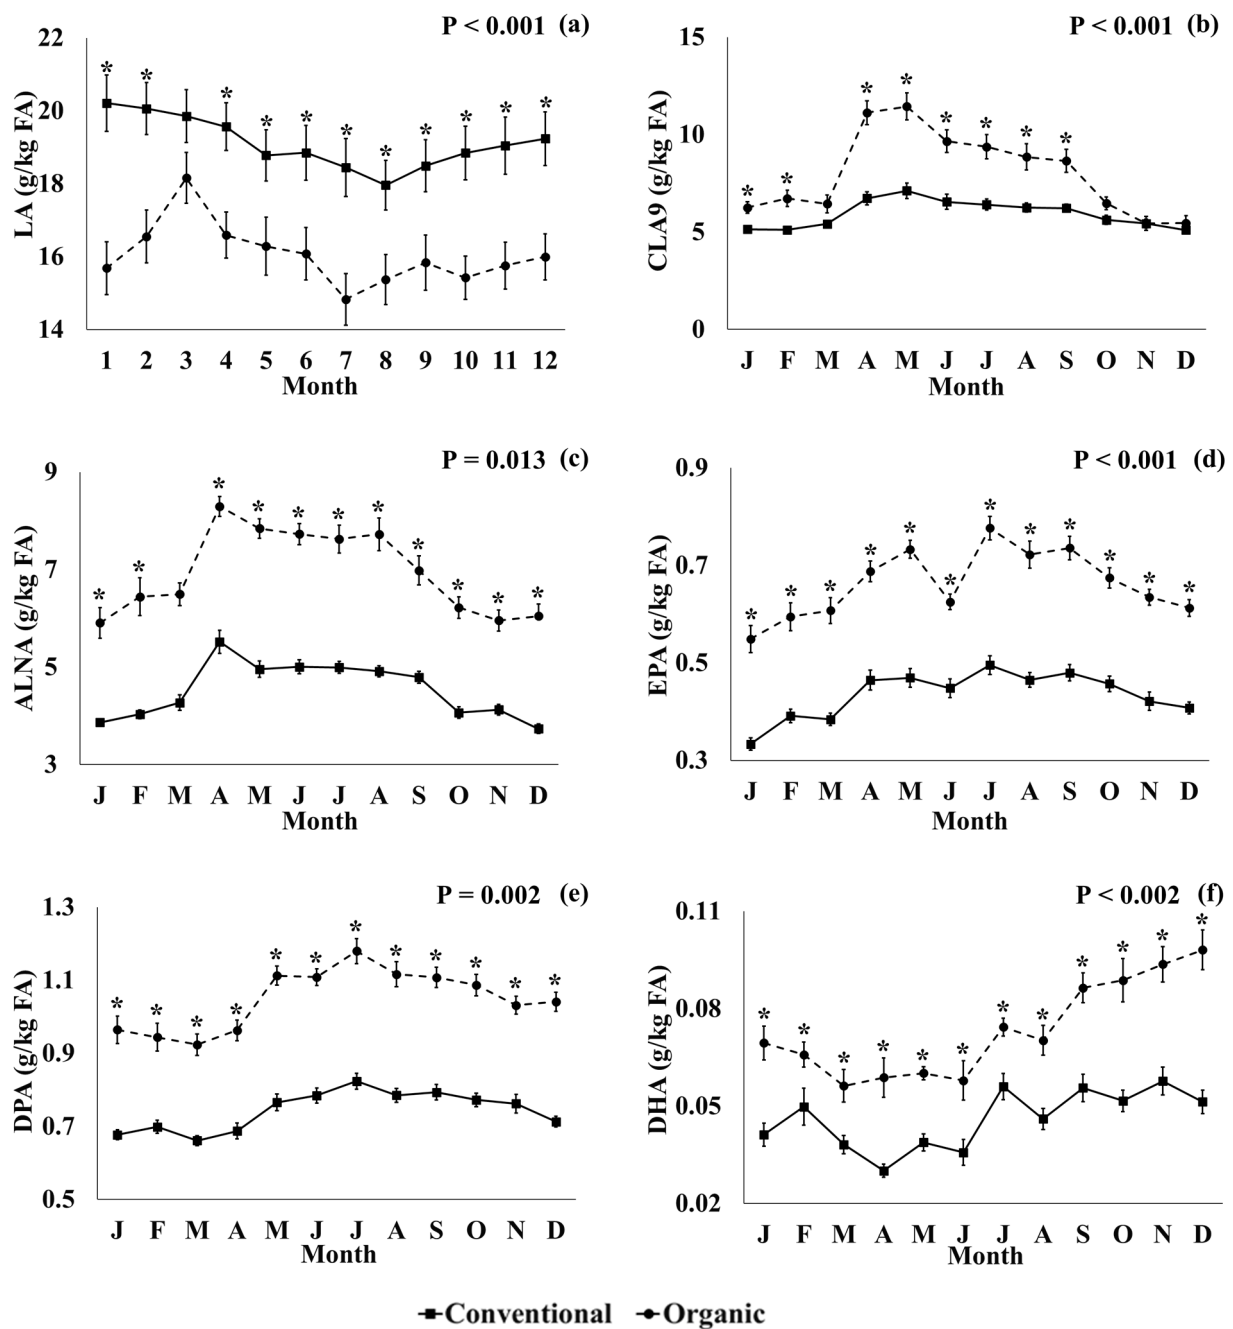

**Figure S3:** Individual polyunsaturated fatty acids not displayed in main text, where a significant ( $p < 0.05$ ) interaction between production system and month was observed. Means were calculated from the measured values. The error bars represent the standard error of the means. \*: significant difference between conventional and organic farms within the month ( $p < 0.05$ ).

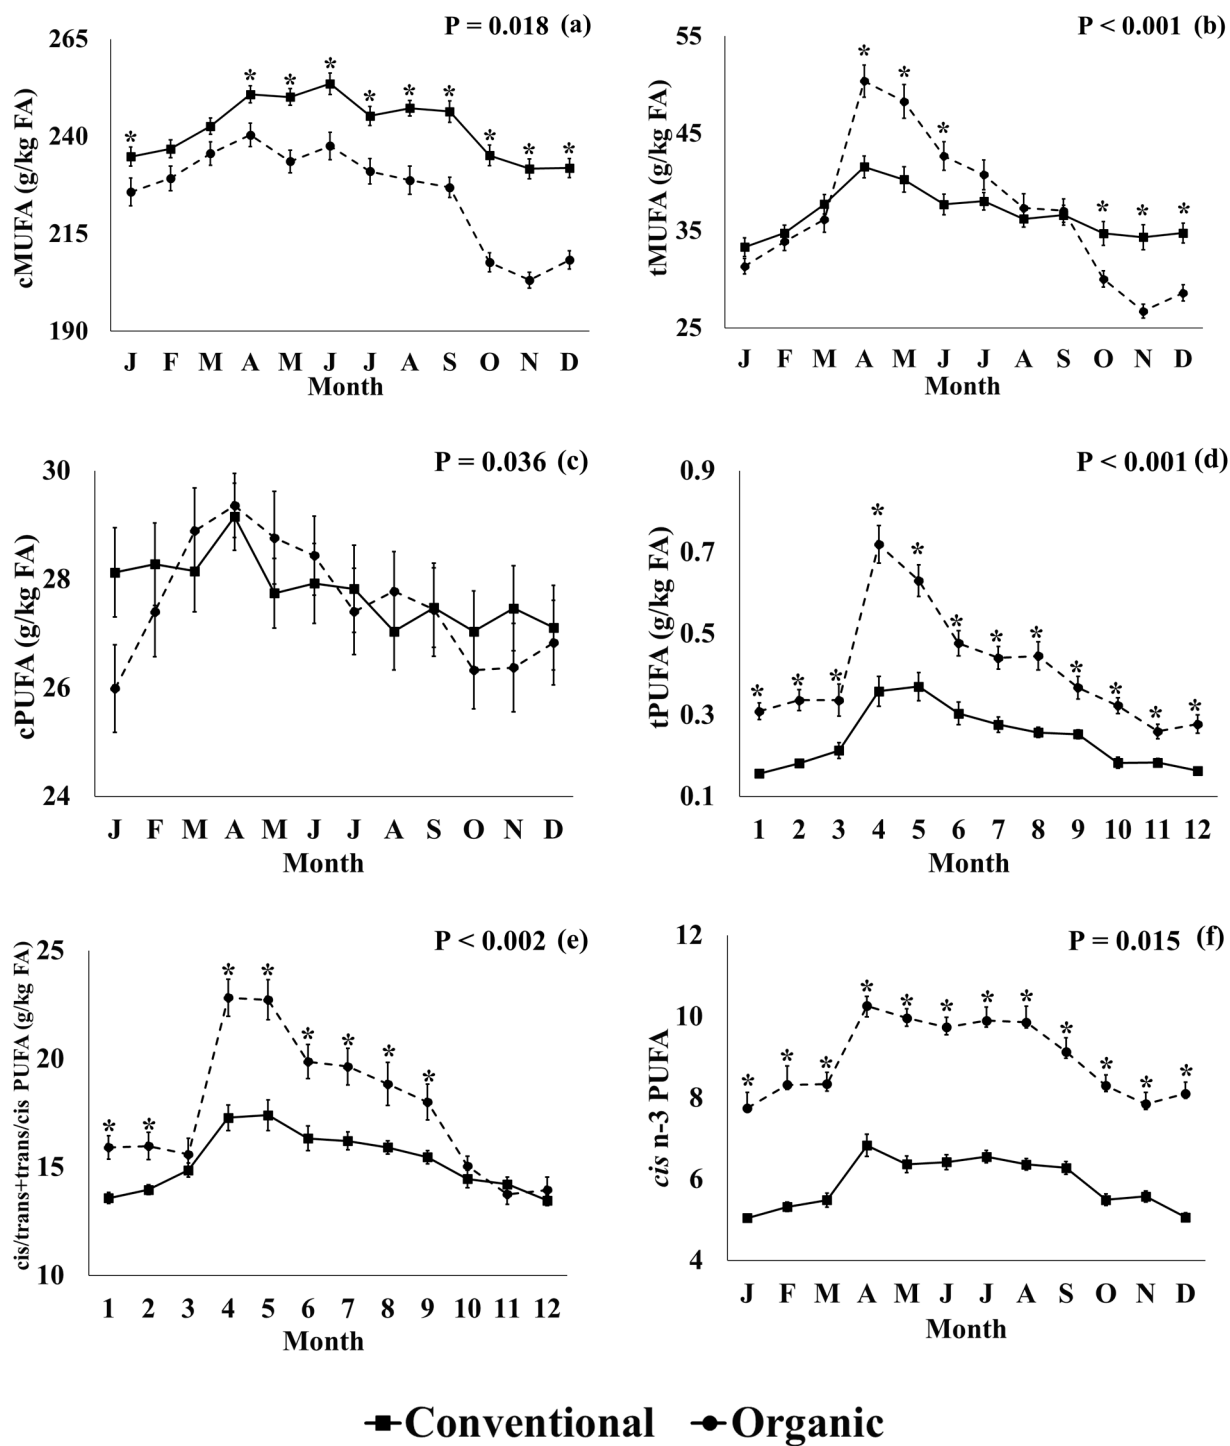

**Figure S4:** FA groups not displayed in main text, where a significant ( $p < 0.05$ ) interaction between production system and month was observed. Means were calculated from the measured values. The error bars represent the standard error of the means. \*: significant difference between conventional and organic farms within the month ( $p < 0.05$ ).

---

## References (supplementary material)

1. Stergiadis, S.; Bieber, A.; Chatzidimitriou, E.; Franceschin, E.; Isensee, A.; Rempelos, L.; Baranski, M.; Maurer, V.; Cozzi, G.; Bapst, B.; et al. Impact of US Brown Swiss genetics on milk quality from low-input herds in Switzerland: Interactions with season. *Food Chem.* **2018**, *251*, 93-102, doi:10.1016/j.foodchem.2018.01.077 .
2. Butler, G.; Nielsen, J.H.; Slots, T.; Seal, C.; Eyre, M.D.; Sanderson, R.; Leifert, C. Fatty acid and fat-soluble antioxidant concentrations in milk from high- and low-input conventional and organic systems: seasonal variation. *J. Sci. Food Agric.* **2008**, *88*, 1431-1441, doi:https://doi.org/10.1002/jsfa.3235.
3. Średnicka-Tober, D.; Barański, M.; Seal, C.; Sanderson, R.; Benbrook, C.; Steinshamn, H.; Gromadzka-Ostrowska, J.; Rembiałkowska, E.; Skwarło-Sońta, K.; Eyre, M.; et al. Composition differences between organic and conventional meat: a systematic literature review and meta-analysis. *Br. J. Nutr.* **2016**, *115*, 994-1011, doi:10.1017/S0007114515005073.
4. Mierlita, D. Effects of diets containing hemp seeds or hemp cake on fatty acid composition and oxidative stability of sheep milk. *S. Afr. J. Anim.* **2018**, *48*, 504-515, doi:10.4314/sajas.v48i3.11.
5. Kay, J.K.; Mackle, T.R.; Auldist, M.J.; Thomson, N.A.; Bauman, D.E. Endogenous Synthesis of *cis*-9, *trans*-11 Conjugated Linoleic Acid in Dairy Cows Fed Fresh Pasture. *Journal of Dairy Science* **2004**, *87*, 369-378, doi:10.3168/jds.S0022-0302(04)73176-8.
